# Supplementary material for: Climate and Land Cover Analysis Suggest No Strong Ecological Barriers to Gene Flow in a Natural Baboon Hybrid Zone
Source: Springer Nature journal article supplement (doi:10.1007/s10764-017-9989-2), 2017-09-09
Supplement: MOESM1 [file 10764_2017_9989_moesm1_esm.xlsx]

## Sheet: Table S1
Table SI LandSat images used in LULC analysis
LandSat image ID	Acquisition date	WRS path	WRS row
LE71670622011043ASN00	2011-02-12	167	62
LE71660632011036ASN00	2011-02-05	166	63
LE71660632011020ASN00	2011-01-20	166	63
LE71680612010351ASN00	2010-12-17	168	61
LE71670632010280ASN00	2010-10-07	167	63
LT51690612010030MLK00	2010-01-30	169	61
LE71660622010001ASN00	2010-01-01	166	62
LE71680622009012ASN00	2009-01-12	168	62
LE71670612010152ASN00	2010-06-01	167	61

## Sheet: Table S2
Table SII Raw weather station precipitation data
Weather station	Year	January	February	March	April	May	June	July	August	September	October	November	December
AMBOSELI	1980	58.8	16.2	25	33.5	9.8	0	0	0.8	0	1.3	42.6	31.7
AMBOSELI	1981	0.8	0	49	177.8	38.4	0	1	0	0	0.3	47.8	18.1
AMBOSELI	1982	5.3	1.5	18	72.5	9.7	3.6	2	0.8	0.3	31.6	147.6	52.7
AMBOSELI	1983	3	113.1	32.5	42.7	39.3	0.8	0	0	0.8	3.1	4.6	129
AMBOSELI	1984	8.4	0	3.9	7.6	1.5	0	0	0	0	2.6	85.2	22.9
AMBOSELI	1985	0.6	87.5	6.3	84.7	7.1	0	1.2	0	0	17.9	43.7	45.6
AMBOSELI	1986	33.1	0	21.7	20.6	45.4	0	0	0	0	58.7	93.6	42.4
AMBOSELI	1987	28.2	4.4	25.2	78.8	26.5	0.8	0	0.8	0	0	51.6	36.9
AMBOSELI	1988	81.6	0	77.4	90.4	23.7	0.4	0	1.6	0	0	66.1	6.4
AMBOSELI	1989	158.4	19.2	16.8	126.4	56.6	0	0	2.8	2.7	17.6	57.8	95.1
AMBOSELI	1990	69.9	10.8	94.8	43.2	28.8	1	0	0	0	4.2	35.2	66.6
AMBOSELI	1991	3.8	29	130	31.6	39.8	0	0	6.4	1	7	49.3	112.2
AMBOSELI	1992	0	11	7.7	34.7	41.6	1	0	0	0.2	2.8	21.2	47
AMBOSELI	1993	269.2	44.2	0.8	0.2	4.2	0	0	0	0	1.2	33.2	103.2
AMBOSELI	1994	0	98.6	67.6	13	9.4	0	0	0	0	23.4	82.2	97.4
AMBOSELI	1995	21	121	52.4	90.8	16.2	0	0	0.4	0	13.2	36.8	40.6
AMBOSELI	1996	6.4	65.4	44.4	20.2	34.4	0.8	0	0	0	0	47.7	2.4
AMBOSELI	1997	1	0	13	109.2	41.2	0	0	0	0	10.4	102.4	194.4
AMBOSELI	1998	174.4	48.8	26	119	89.2	2.4	0	0	0	0	66.7	20.8
AMBOSELI	1999	3.8	0	180.1	61.8	3.8	0	0	0	0	34	111.6	64.8
AMBOSELI	2000	5.2	0	4.4	1	0	0.6	0	0	0	0.8	81	106.2
AMBOSELI	2001	228	3.2	56.3	35.2	7.2	0	0	0	0	0	26.2	24
AMBOSELI	2002	61	0	43.4	58	48.8	0	0	0.8	1	7.2	50.5	130.9
AMBOSELI	2003	5.4	9.8	12.7	19.6	101.8	0	0	0	0	0.8	27.6	7
AMBOSELI	2004	68	42.6	30.8	30.6	6.6	0	0	0	0.2	7.8	11	77.6
AMBOSELI	2005	16.6	0	116.2	90.4	23.9	4.2	1	0	0	4.6	30	0
AMBOSELI	2006	10.8	13.4	106.8	36.6	27.4	0	0	0	0	2.2	55.1	243.8
AMBOSELI	2007	64.4	11	2.8	25	8	0	0	3.2	0	5.5	16.4	45.4
AMBOSELI	2008	32.2	10.6	73.5	4.4	4	0	0	0	0	4.6	68.2	0
AMBOSELI	2009	14.6	9.4	4.4	37.8	4.3	2.2	0	0	0	0	50.4	66
AMBOSELI	2010	198.2	13.2	153	25.8	21.8	15.4	0	0	0	15.4	55.2	46.4
AMBOSELI	2011	0	31	105.4	6.3	2.8	0	0	0	0	24	73.9	22.3
GARISSA	1980	0	0	9.2	17.6	0	0	7.4	23.8	0	8.9	NA	2.5
GARISSA	1981	0	0	113.2	81.3	19.9	0	0	6.6	1.6	11.2	61.2	7.4
GARISSA	1982	0	0.2	24.1	102.3	18.6	2.4	0	0.7	36.9	157.6	60.5	34.7
GARISSA	1983	9	5	2.4	40.2	5.1	10.6	1.6	1.1	7.7	13	2.6	19.2
GARISSA	1984	0	0	1.9	25.5	1.1	2.5	5.2	0	1.6	69.5	225.5	60
GARISSA	1985	0.5	0.1	24.9	34.3	21.4	1.4	6.6	9	2.6	23.3	16.9	34.6
GARISSA	1986	0	0	12.8	134.8	18.2	0	1	10.7	1.8	4.8	67	97.6
GARISSA	1987	19.2	0	1	82.3	20	0	17.1	14.3	1.1	0	20.9	1.8
GARISSA	1988	12.5	0	81.8	103.6	0.8	16.1	0.1	4.1	13.1	6.4	76	76.3
GARISSA	1989	27.1	NA	4.6	273.6	2.2	0	NA	1.4	5.9	85.3	234.5	6
GARISSA	1990	2	14.5	180.2	78.5	1.4	1.5	NA	0	0.9	17.9	149.6	49.6
GARISSA	1991	5.6	NA	34.5	NA	5.3	3.1	41.4	2.9	10.9	2.2	NA	64.5
GARISSA	1992	6.3	0	1.2	43.2	6.1	1.8	0.6	2.9	5.6	4.6	121.7	118.4
GARISSA	1993	72.1	4.3	8.2	0.7	3.6	16.3	2.6	2.6	6.9	14.4	128.3	76
GARISSA	1994	0	0	6.5	77.5	10.3	36.2	4.1	0.8	10.8	14.9	220.3	47.2
GARISSA	1995	0	1.1	43.2	127.3	8.3	0	3.9	75.7	2.7	42.1	16	90.3
GARISSA	1996	0	4.4	27.1	12.4	21.9	0.9	0.4	0	0	0.3	62	3.6
GARISSA	1997	0.2	0	140.2	91.5	5.6	21.7	0.1	0	0.4	166.2	350.1	174.4
GARISSA	1998	276.8	6.1	51.1	84.4	68.9	7.9	16	0.5	0.2	7.7	80.7	38.7
GARISSA	1999	0	0	42.9	61.6	27.4	1	0.5	3	2.1	3.8	77.2	81.6
GARISSA	2000	5.8	0	14.9	36.9	2	4.1	0	1.8	9.9	15.9	57.3	12.7
GARISSA	2001	3.2	0.6	9.5	62.2	9.9	2.4	0.9	0.3	0	4	118	49.2
GARISSA	2002	0.2	0.4	32.5	169.6	8.7	2.9	9.7	10.6	52.2	60.5	130.5	82.8
GARISSA	2003	1.7	0	18.4	156.7	44.7	1.5	2.5	5.3	0.7	41.5	106.2	19.2
GARISSA	2004	0	1	8.4	43	0	3.9	0.2	0	1	0.4	105.3	22.7
GARISSA	2005	0	1.7	2.5	12.8	NA	0	8.5	2.2	2.7	1	22.9	3.5
GARISSA	2006	28.2	5.6	34.7	107.2	24.1	4.8	7.7	1.6	6.9	31.1	270.4	77.3
GARISSA	2007	0.7	0	12.6	2	28.7	2.4	0.6	9.1	12.2	16	189.6	35.8
GARISSA	2008	29	0	44.1	60.9	8.3	18.3	0	3	0.3	3	106.7	7.2
GARISSA	2009	0.1	0.5	0	21.3	9.8	6.7	0	0	0.2	98.2	16.7	132.4
GARISSA	2010	0	5.9	132.5	130.4	17.1	1	11.5	2.4	1.1	4.4	46	53.7
GARISSA	2011	0.9	0	0	38.1	22.1	0	0	0	0.7	138.3	70.1	16.6
LAIKIPIA	1980	1.7	18.8	2	57.3	63.6	26.3	0	3.3	27.2	28.8	56.9	14.8
LAIKIPIA	1981	0.4	0.9	174.1	77.8	72.4	80	43.2	81.5	97.8	88.7	53.2	32.4
LAIKIPIA	1982	20.6	2.3	20.7	140.6	54	2.2	12.5	0	21.3	120.3	98.2	15.8
LAIKIPIA	1983	1.9	35.4	18.1	93.6	53	32.5	41.7	96.8	14	84.6	43.9	64.3
LAIKIPIA	1984	3.8	0.4	2.7	35.4	20.2	2.8	0	4.5	20.2	43.6	94.4	0
LAIKIPIA	1985	8.7	24.1	46.4	87.7	79.1	41.2	18.2	NA	23.3	82.9	51.2	18.2
LAIKIPIA	1986	16.2	5	63.8	203.4	100.9	164.1	NA	NA	NA	NA	NA	NA
LAIKIPIA	1987	13	11.7	NA	NA	NA	NA	NA	NA	NA	NA	NA	NA
LAIKIPIA	1988	70	0.1	68.7	0	52.2	30	0	NA	114.8	41.8	76.6	41.4
LAIKIPIA	1989	47.5	24.4	84.9	92	131.7	0	100.1	27.7	61.8	79.2	73.1	30.9
LAIKIPIA	1990	16	34.6	51	138.9	58.3	9.6	68.5	20.3	33.4	90.9	88.2	0
LAIKIPIA	1991	21.4	0	10.8	139.1	0	NA	NA	NA	NA	NA	NA	0
LAIKIPIA	1992	21.6	1	19.6	143.3	66.8	NA	NA	NA	NA	NA	NA	51.5
LAIKIPIA	1993	0	11.4	0	0	0	34.7	NA	NA	NA	NA	NA	0
LAIKIPIA	1994	3.8	19.9	19	109.3	NA	37.3	20.2	43.5	45.6	90.3	143	14.5
LAIKIPIA	1995	NA	NA	NA	NA	140.6	30.2	39.7	28.5	54.5	NA	72.4	38.3
LAIKIPIA	1996	13	3.7	32.6	64.4	11.8	74.2	46.3	139.7	46.4	30.2	67.2	32.7
LAIKIPIA	1997	NA	NA	44.3	156.1	51.7	63	77	55.3	29	211.1	181.8	98.5
LAIKIPIA	1998	133.4	61.3	0	98.1	116.6	62.2	124.1	0	31.1	76.9	71.2	10.1
LAIKIPIA	1999	23.5	26.3	59.5	81.1	34.3	5.2	28.2	32.4	3.5	69.8	56.7	33.3
LAIKIPIA	2000	24.6	0	2.8	44.1	21.8	6.9	33.7	23.6	4.2	64	50.1	11.3
LAIKIPIA	2001	94.9	0	131.7	76.2	45	32.8	77	36.9	25	84.4	144.3	3.7
LAIKIPIA	2002	12.6	0	61.8	137.2	103.2	19.4	34.9	12.4	18.1	66.9	61.1	109.6
LAIKIPIA	2003	7	8.2	50.9	222.5	145.1	13.4	63.8	123.6	19.2	56.1	85.8	30.5
LAIKIPIA	2004	58.9	28.5	55.9	116.5	56.8	47.8	86.6	56.8	40.5	37	108.4	16.6
LAIKIPIA	2005	3.2	0.4	10	168.2	86.5	28.1	74.5	40.2	140.3	54.1	18.1	6.8
LAIKIPIA	2006	3.8	7.4	79.7	102.5	45.9	12.7	9.6	124.6	31.6	49.8	106.8	48.1
LAIKIPIA	2007	30.9	28.7	19.9	122.1	56.7	105.2	45.9	112.8	57.4	71.9	23.7	19.6
LAIKIPIA	2008	14.5	4.6	51.6	52.8	25.6	13.6	51.3	25.2	96.3	76.3	95.8	32.7
LAIKIPIA	2009	23.6	5.6	0	48.3	47.3	28.3	19.6	49.7	13.8	93.5	38.3	100.6
LAIKIPIA	2010	14	81.3	171.1	110.9	84.6	32.5	34.2	36.5	32.1	74.9	83.9	12.3
LAIKIPIA	2011	6.2	4.1	42.4	89.7	57.8	61.7	126.4	100.4	85.5	82.2	179	45.7
MACHAKOS	1980	38.7	0.8	113.2	107.6	88.9	0	0.6	6.4	0	1.5	151.4	27.2
MACHAKOS	1981	10.7	10.7	171.7	182.4	87.4	0	0.5	1.6	7.2	57.5	55.3	63.3
MACHAKOS	1982	0.1	1.6	68	93.1	99.4	3.6	8.5	4	9.5	111.7	252.2	99.2
MACHAKOS	1983	12.9	120.3	4.4	116.8	7.2	10.3	4.2	7.4	1.2	4	43.2	158.6
MACHAKOS	1984	24.2	0	3.4	51.4	0.6	0	7	6.4	15.7	154.4	211.2	341.4
MACHAKOS	1985	5.3	110.5	78.7	278.3	84.6	0	1.4	1.9	0.2	56	75.1	121
MACHAKOS	1986	59	0	59.4	192.4	72.7	5.7	0.4	0.3	0	2.6	180.8	127.2
MACHAKOS	1987	31.7	0	23.3	56.7	39.4	61.9	3.6	11.6	0	0.3	93.5	12
MACHAKOS	1988	93.7	13.8	109.3	203.7	23.6	10.1	0	3	15.4	33.5	120.8	180.2
MACHAKOS	1989	133.2	4	51.1	193.7	37	0	3.8	14.6	0.3	96.9	106	129.5
MACHAKOS	1990	42.8	23.2	217.3	251.5	64.9	5.1	0	3.4	0	48.8	208.5	110.2
MACHAKOS	1991	29.3	13.3	43.5	80.5	57.5	3.1	1.4	8.9	3.4	46.5	119.9	156.7
MACHAKOS	1992	12	6.1	5	192.9	32	1.1	6.8	0	0.7	31	141.2	186.2
MACHAKOS	1993	256.5	84.9	60.9	20.8	13.7	6.3	0.5	3.1	0.6	26	150.8	67.3
MACHAKOS	1994	0	103.5	75.3	82.4	29.8	8.2	3.3	9.9	4.3	110.9	406.3	143.7
MACHAKOS	1995	28.5	83.3	150.1	49.6	33.1	0.9	4.1	3.2	5.1	103.7	46	87.6
MACHAKOS	1996	22.4	56.5	73.7	96.4	42.8	19.3	2.2	2.2	0.7	0	187.7	1.5
MACHAKOS	1997	3.8	0	46	208.5	21.2	0.5	1.2	4.3	0	83.2	270.3	177.3
MACHAKOS	1998	290.8	219.4	118	123	162.6	38.7	15.4	2.9	1.8	3.2	113.9	15.9
MACHAKOS	1999	16.1	2.2	121	113.8	9.8	5	2.4	4.9	0	20.6	257	108.6
MACHAKOS	2000	7	0	52.5	68.5	15.6	6.2	0.3	1.8	2.3	41	189.8	98.8
MACHAKOS	2001	244.8	0	113	88.9	15.3	4.3	4.3	2.5	0	7.3	169	43.6
MACHAKOS	2002	79.5	7.5	98.9	120.4	126.6	1.4	0	0.2	8.8	21.2	144.3	182.4
MACHAKOS	2003	31.6	17.2	115.2	153.2	133.8	0	0	26.3	21.5	31.8	121.1	24.1
MACHAKOS	2004	48	47.9	83.1	121.5	59.8	0.7	0	0	1	47.6	161.3	89.5
MACHAKOS	2005	12.2	19.2	101.7	165.1	100.5	0	0.5	1.5	0	8.4	93.4	12.8
MACHAKOS	2006	30.9	53.1	105	175.9	107.5	2.4	0.6	17.5	2.1	10.7	328.4	321.3
MACHAKOS	2007	61.4	44.8	20.5	143.9	41.7	2.7	26.8	5	4.3	18.3	128.2	82.1
MACHAKOS	2008	117.4	7.3	73	129.3	4.5	0.3	1.3	0.2	9.1	23.9	122.8	39.9
MACHAKOS	2009	74.2	26.3	3.2	145.4	29.7	5.2	0	0	1.2	41.3	34.4	136.7
MACHAKOS	2010	57.1	64.1	232	107.9	120.9	1.4	2.7	1.3	0.6	29.3	116	59.6
MACHAKOS	2011	9.1	71.8	209.8	1	37.8	0	3.4	0.7	5.9	50.2	180.2	27.8
MAKINDU	1980	48.4	20.7	0	66.7	21.2	0	0	7.1	0.1	0.6	137.1	37.8
MAKINDU	1981	0	0	104.9	287.3	80	0	0	0.4	2.4	42.9	45.5	97.9
MAKINDU	1982	1	0	7.4	176.2	34.6	0.5	1.6	1.2	11.3	147.6	397.7	158.4
MAKINDU	1983	0.5	36.9	3	40.8	12	0.1	0.5	0	2.3	0.3	15.8	147.2
MAKINDU	1984	27.7	0	6	86.9	0	0	1.2	0	0.4	85.6	358.9	122.4
MAKINDU	1985	5.3	83.3	34.1	81.9	16.8	0.2	1.6	0	1.6	67.4	125.6	283.8
MAKINDU	1986	19.7	0.1	36.3	159.5	22.4	6.5	0	3	0	20.4	181.8	169.6
MAKINDU	1987	16.5	0	16.1	62.9	70.4	19.5	1	2	0	0.5	108.9	10.4
MAKINDU	1988	79.5	1	175	99.4	6.3	7.1	1.3	1.1	2.1	2	176.5	160.2
MAKINDU	1989	131.4	1.2	76.6	260.6	49.8	81.3	0	0.7	0.6	125.3	196	143.4
MAKINDU	1990	49.9	81.3	135.1	123.3	8.7	0	0	0	0.2	5.5	181.8	199.8
MAKINDU	1991	28	0.3	38	60.3	38.4	2	1.4	21.2	0	0.2	191.2	97.5
MAKINDU	1992	23.5	0	9.7	154.7	24.3	0	0	0	2.6	101.6	139	142.6
MAKINDU	1993	140.8	69.3	16.7	0.6	1.6	0.9	0	2.2	0	61.3	102.9	111.9
MAKINDU	1994	0.4	40.2	56.2	101.7	12	0	0.3	0	0.3	17	247.5	299.9
MAKINDU	1995	2.7	57.9	94.7	20.2	12.1	0	0.3	0.7	0	58.4	71.3	49.9
MAKINDU	1996	6.8	65.6	104.9	49	25.7	1.7	0.8	0	0.3	0	190.4	7.8
MAKINDU	1997	0.2	0	10	158.3	37.4	3.7	0	0	0	39.4	273.2	282.6
MAKINDU	1998	405.2	231	40.2	86.6	121.2	16.5	5	0	0	0	115.4	27.8
MAKINDU	1999	6.6	0	84.7	49.3	2.1	0.5	0	0.9	0	0.2	490.4	99.8
MAKINDU	2000	3.9	0	14.5	123.2	2.5	2.4	0.7	3.4	5.1	0	185.5	179.8
MAKINDU	2001	0.1	1.8	63.1	89	0.2	1.9	0	0	0	0.1	278.4	148.8
MAKINDU	2002	22.3	7.2	126.3	43.1	30.1	0.4	0	4.1	19.5	25.9	100.2	131.2
MAKINDU	2003	0.3	34.6	79.5	64.2	35	0	0	0	0.6	0	68	65.3
MAKINDU	2004	155.1	63.4	72.2	45.7	0	0.3	0	0	1.2	26	33.6	89.3
MAKINDU	2005	4	0	51.6	44.5	29	0	0.4	2.9	1.6	14.5	71.4	6.1
MAKINDU	2006	2.2	0.2	42.5	81.3	45.1	0.1	0	0	6.8	57.2	252.8	363.3
MAKINDU	2007	103.2	5.6	51.7	44.7	5.9	1	0.3	0	0	12	130.5	112.9
MAKINDU	2008	57.7	7.3	222.4	13.4	1	0	0	0	1.3	14.2	82.5	5.8
MAKINDU	2009	29.3	13.6	1.2	38.2	13.1	0.3	0	0	0	57.6	54.5	161.1
MAKINDU	2010	11.8	123.4	160.7	63.6	13.5	0	0	0	1.2	3.6	109	52.8
MAKINDU	2011	13.5	47.8	111	1.5	4.1	0	0	0	0.3	27.1	137.3	114
MERU	1980	78.1	0	8.8	121.9	124.8	0	1.1	10.4	3.4	130.6	383.2	23.1
MERU	1981	4.8	25.4	322	274	168.3	11.2	6.4	10.9	23.1	150.7	225.3	54.1
MERU	1982	16.2	0.3	77.5	346.4	214.9	12.4	1.5	5	29.3	423.8	231.9	168.2
MERU	1983	8.7	49.3	1.7	204	201.8	2.3	10.2	14.5	15.3	85.9	171.4	176.3
MERU	1984	10.6	12.1	11	154.4	53.2	0.2	15.1	3.7	4.4	496.2	311.6	114.3
MERU	1985	23.3	6.2	167.4	249.9	145.7	7.7	16.1	7.7	17.8	144.6	193.4	42.3
MERU	1986	5.6	3.6	87.6	417.2	105.6	41.5	1.1	0.5	11.8	93.5	237.8	132.3
MERU	1987	34.9	0	64	209.8	93.3	28.1	3.5	16.8	0	2.2	187.1	29.4
MERU	1988	28.6	32.5	69.4	399.4	103.6	8.7	23.1	28.8	23	250.2	288.4	283.5
MERU	1989	115.2	59.6	83.2	177.9	47.1	2.3	14.4	15.1	29.3	272.5	399.2	307.6
MERU	1990	52.5	178.1	185	208.9	NA	5.4	7.7	3.3	2	250.4	376.9	NA
MERU	1991	79.9	NA	73.6	220.3	129.3	0.7	63.7	18.9	0.2	154.2	200.6	234.5
MERU	1992	28.3	14.9	3.7	196.6	223.3	0.7	10.5	4.7	8.6	170.9	494.8	275.3
MERU	1993	394.5	96.5	25.1	262.4	215.6	3.6	3.7	2.6	4.6	174.4	251.5	135.1
MERU	1994	5.5	30.1	13.4	161	44.7	4.1	18.2	11.4	5.7	303.8	557.1	242.6
MERU	1995	30.1	44.5	134.1	383.9	61.1	2.8	11.9	30.1	15.1	370.2	168.3	271.6
MERU	1996	61.4	5.2	55.6	36.5	296.3	50	10	13.3	2.5	90.6	304.3	48.2
MERU	1997	18.5	0	97.8	414	70.2	9.2	2.6	1	3.8	585.4	672.8	344.6
MERU	1998	504	112.6	114.8	144.5	191.5	10.2	7.8	26.8	7.5	50.6	232.5	23
MERU	1999	16.5	9	115.5	121.8	67.6	2.8	6.2	5.4	4.8	61.7	378.8	225.9
MERU	2000	10.4	8.2	7.2	90.2	23.4	2.4	9.8	7.6	6	49	241.6	142.4
MERU	2001	153	2.3	154.4	228.8	25.5	9.6	8.2	10.1	4.6	30.9	524.7	65.2
MERU	2002	28.4	8	206.4	540.9	103.6	5.3	8.6	11.4	43	434.9	226.1	208.6
MERU	2003	41	3.4	58.1	481.3	65.4	0.8	7	13.9	9.9	389.3	337.5	123.1
MERU	2004	111.3	60.3	44.3	242.6	97.7	3.6	10.5	3.6	11.4	317	338.2	177.2
MERU	2005	0	6.5	22.4	155.8	182.1	7.2	12	9.3	12.1	139	232.8	38.2
MERU	2006	35.2	59.8	33.8	292.9	125.9	4.5	0.7	37.2	87.8	298.5	477.1	273.3
MERU	2007	109	10.6	111	190.8	167.3	0	16.3	18.3	11.6	304	205.8	110.7
MERU	2008	95.1	0	62.5	201.2	8.7	2.1	11.1	3.4	7.5	289.9	270	40
MERU	2009	153.5	23.1	46.8	138.4	19.9	0	1.2	7.2	0.9	474	199.7	152.1
MERU	2010	115	150	181.3	318.9	47.4	4	32.1	22.3	1.8	185.5	264.1	31.6
MERU	2011	20.7	36.7	40.5	166.1	69.8	31.9	8.4	14.7	34.6	435	466.6	164.6
NAKURU	1984	3.6	6.1	11.8	65.1	32	67	87.6	36	69.4	83	62.1	63.6
NAKURU	1985	27.8	39.4	96.8	297.5	99.6	123.7	88.5	69.5	27.9	23.6	73.5	8.5
NAKURU	1986	0	1.1	21	171.9	94.3	163.3	111.5	135	76.2	46.2	41	72.7
NAKURU	1987	23.5	22.4	35.7	80.2	125.4	179.3	22.8	52.4	27.9	39.1	87.9	4.1
NAKURU	1988	71.3	6.5	43.3	222.4	308.1	80.3	120.2	91.6	125.2	71.7	58.2	46.3
NAKURU	1989	29	80	69.5	97.6	82.4	59.4	0	80.3	175.2	138.7	93.5	115
NAKURU	1990	42.2	78.6	153.6	207	125.9	30.3	54.5	56.7	46.8	70.9	64	52.6
NAKURU	1991	49.1	1.5	0	0	49.6	40.5	73.2	84.4	86.2	44.7	60.4	17.6
NAKURU	1992	41.3	4.7	13.3	139.5	136.8	52.4	142	165.8	76.2	106.5	49.9	0
NAKURU	1993	89	111.2	9.2	39.1	76.9	80.4	63.1	65.2	38.8	42.6	56.8	26.6
NAKURU	1994	0	20.9	73.9	115	100.8	117.6	75	106.9	51.6	43.5	93.5	7.7
NAKURU	1995	2.8	29.5	103.2	70.7	87.4	79	40.8	NA	NA	NA	78.7	43.4
NAKURU	1996	8	37.1	70.4	46	81.4	15.8	194.3	101.1	85.6	64.1	96.2	4.4
NAKURU	1997	10.5	0	21.9	207	55.4	71.4	118.3	100.6	45.1	178.9	222.3	63
NAKURU	1998	132.6	61.4	52.4	90.5	187.5	101.5	58.9	77.3	93.2	47.4	151.3	4.3
NAKURU	1999	15	0	114.5	100.3	49.2	26.5	62.4	99.3	32.7	37.5	76.3	60
NAKURU	2000	0	0	0	37.7	30.9	40.6	108.5	150.6	41.2	61.1	108.8	30.6
NAKURU	2001	60	18.2	83.1	203.3	47.9	128.5	146.4	164.9	82	88.1	98	9.4
NAKURU	2002	40.1	17.5	117.6	188.6	107.3	73.7	78	66.1	11.1	124.4	91.3	168
NAKURU	2003	54.2	1.5	83.7	113.2	266.7	95.2	78.6	211.9	57.5	92.9	52.2	28.4
NAKURU	2004	80.9	51.7	52.8	210.1	99.2	45.2	28.3	91.1	54.1	80	53.4	124.8
NAKURU	2005	19.3	18.5	82.1	87.6	175.9	103.7	67	105.3	154.4	68.6	24	19.5
NAKURU	2006	21.5	13.2	85.7	113.9	131.9	66.8	70.9	89.9	32	57.3	188	106.6
NAKURU	2007	57.7	128.6	28.3	157	134.8	106.5	162.8	145	148.7	92.1	46.2	9.6
NAKURU	2008	15.7	6.5	87.3	48.7	43.2	36.5	72.3	112.8	106.1	175.7	120	15.3
NAKURU	2009	15.7	7.3	11.6	191.4	184.3	15.3	19	37.4	46.7	62.3	110.5	135.9
NAKURU	2010	15.7	151.4	225.4	157.2	200.1	35.9	111.8	169.4	161.1	147.4	45.6	13.9
NAKURU	2011	1.1	0.2	104.6	58.4	111.4	109	173	123.9	146.4	114.1	126.7	37.7
NAKURU	2012	0	34.8	8	274.3	170.4	78.4	110.2	102.7	116.3	116.1	70	65
NAROK	1984	45.3	4.4	24	88.2	6	0.9	21.5	8.7	16.2	59.4	52.8	120.5
NAROK	1985	10	157.6	78.8	287.3	51.9	56.1	19.7	2.6	15.3	3.7	81.4	78.2
NAROK	1986	46.9	19.5	25.7	129.1	78.3	9.4	7.4	0	12.4	10.7	54.7	95.4
NAROK	1987	157.8	59.2	174.4	85	142.8	53.3	55	13.1	26.4	0.5	81	12.4
NAROK	1988	164.6	8.3	168.5	272.2	54.4	10.5	17.4	40.2	5.2	18.5	7	56.6
NAROK	1989	210.3	119.6	96.4	137.4	90.2	21.6	31.7	45.3	78.4	5.1	25	225.4
NAROK	1990	35.9	122.9	163.3	152.5	84.9	14.2	2.5	25.4	14.7	0	0	29.3
NAROK	1991	55.2	0	79.1	130.2	0	44.3	9.1	11.2	3	63.7	22.8	62
NAROK	1992	14.4	84.3	49.8	126.4	35.8	18.2	27.7	6.2	11.8	38	12.8	48.9
NAROK	1993	258.2	106.3	38.2	15.8	151.1	90.5	0.8	34.4	0.6	24.3	52.7	48.3
NAROK	1994	58.4	118.1	109.1	140	103.1	16.2	8.9	46	0	21.5	135	25.9
NAROK	1995	39.7	56.2	141.6	66.3	142.8	32.9	7	24.2	61	19	38.2	34.3
NAROK	1996	81.7	124.2	140.6	85.9	18.2	113.8	89.2	35.8	25.3	8.8	52.5	40.1
NAROK	1997	37.1	6.3	54.9	247.6	144.1	26.6	9.1	34.5	10	38.8	254.3	126
NAROK	1998	NA	171.8	11.4	122.4	167.7	61.2	3.3	31.5	15.6	10.2	27.1	7.3
NAROK	1999	37.5	5.2	291.5	64.8	21.7	3.9	2.9	23.5	20.1	9.5	73	102.5
NAROK	2000	17.6	18	60.5	71.3	18.7	2.4	4.6	11.4	15.1	9.3	143.9	86.8
NAROK	2001	232.9	80	56.1	136	26.2	22.6	51.5	24.2	21.3	33.1	19.3	35.6
NAROK	2002	166.1	59.2	95	120.6	140.4	2.9	9.6	10.1	12.2	47.6	186.7	194.8
NAROK	2003	103.6	73	54.9	156.4	261.4	8.6	2.5	79.3	8.9	19.9	22.1	15.4
NAROK	2004	25.1	79.3	121.8	235.4	78.8	3.2	0	0	43.6	9.3	28.1	78.4
NAROK	2005	25.1	0	114.5	81.7	126.7	0	21.6	12.5	7.6	15.4	22.3	13.6
NAROK	2006	101.3	61	123.4	210.8	59.1	1.6	21.6	32	21.7	1	271	154.5
NAROK	2007	105.9	143.2	59.5	89.9	97.2	34.6	10.8	22.4	69.4	9	30.3	39.7
NAROK	2008	8.6	99	201.3	88.9	7.8	1.4	9.2	23.1	35.1	56.7	86.3	1.6
NAROK	2009	52.9	24.4	22.6	103.9	107.7	36.7	0.5	3.1	17.2	33.7	53.5	123.8
NAROK	2010	150.5	103.4	93.3	69.4	113.9	11.1	5.1	36.9	59.6	49.2	69.3	38.1
NAROK	2011	68.5	34.9	128.9	16.1	54.8	33.1	19.6	47.9	89.3	143.7	143.6	147.4
NAROK	2012	0	60.7	62.6	208	87.4	8.6	22	53.8	3.6	17.5	56.9	198.5
VOI	1980	50.4	15.8	54.1	49	4.4	0	1.5	32	8.9	2.6	97.3	96.9
VOI	1981	1.5	0.7	248.4	84.1	22.6	0	3	2.7	13.8	35.2	62.5	259.1
VOI	1982	4.5	0	68.6	82.9	25.9	5.3	10.1	12.9	60.8	106.4	254	64.2
VOI	1983	2.7	55.5	89.9	3.1	36.3	2.8	5.6	0.1	4.2	0	81.7	43.5
VOI	1984	0.3	0.6	24.5	60.2	1.6	10	4.6	0.2	4.1	72.5	120.6	229.2
VOI	1985	37.9	52.3	10.6	69.4	14.3	0	6.9	2.5	5.4	18	93.9	143
VOI	1986	7.6	0.1	24.2	30	97.3	0	0	8.4	0	20.4	148	218.7
VOI	1987	22.2	2.3	8.3	160.7	44.8	1.6	11.4	17.7	0	6.1	53.5	18.5
VOI	1988	110.4	3.5	95.4	65.7	4.8	6.4	0.1	9.9	29.5	27.3	63.1	193.4
VOI	1989	32.6	0	8.5	120.9	9	0	0	6.9	2.2	68.1	114.5	123.2
VOI	1990	11.8	53.9	204.3	209.5	1.3	0	0	0	19.8	19.4	57	170.7
VOI	1991	8.6	2.7	186.7	147.6	41.5	5.1	13.9	44.8	2.6	18.4	33	88.5
VOI	1992	2	3.3	44.8	103	31	8.9	0	1.9	1.2	20.6	192.8	198.2
VOI	1993	142.2	19.4	16.9	72.5	3.5	9.9	0.8	6.6	1	16.9	140.9	106.8
VOI	1994	8.1	21.5	203	10.9	24.8	1.2	5.7	2.3	10.6	14	264.1	202.1
VOI	1995	8.2	26.8	23.6	114.5	5.4	0	0.4	9.6	0	20.9	205.5	18.6
VOI	1996	6.2	29.3	106.3	62.3	37.8	0	0.6	0	0.4	2	176	56
VOI	1997	1.9	0	39.3	127.2	41.6	9.2	0	0	0.6	113.5	212	169.5
VOI	1998	355.8	196.8	120.2	129.3	26	1.2	3.8	0	10.2	4.2	238.4	53.9
VOI	1999	16.3	7	48	109.4	8.6	14.3	0.5	6.7	3.9	0.4	112.8	111.9
VOI	2000	3	0	67.9	5.7	10.9	14.1	0.2	19	18.5	17.3	192	195.1
VOI	2001	126.4	4.1	91.3	32.3	6.8	7.9	0	0.5	0	5.7	133.1	171.4
VOI	2002	89.6	2.1	57	27.2	59.9	2.9	2.7	15	44.3	98.6	213.7	185.5
VOI	2003	2.3	6	66.9	21.7	28.7	1.4	0	6.3	3.2	0	23.8	50.1
VOI	2004	247.7	41.6	38.7	128.6	0	9.2	1.2	0	0	62.6	141.4	128.9
VOI	2005	18.2	2	64.8	59.3	34.6	0	1.1	4.9	8.2	14.7	48.8	24.6
VOI	2006	22.4	0	97.4	113.6	29.7	2	2.8	0.8	36.1	27.4	171.5	274.3
VOI	2007	53.6	8.6	48.1	12.7	42.7	9.7	8.2	10.4	1.5	35	0	24.6
VOI	2008	30.5	6.5	144.7	105.1	2.3	2.3	3.5	4.7	4.7	1.7	143.3	31.7
VOI	2009	46.2	9.2	59.7	137	0	17.3	0.6	0.6	0	107.8	102.2	207.2
VOI	2010	79.1	24.9	102.3	43.8	22.9	1.2	0	0.7	3.9	1.4	75.4	107.4
VOI	2011	1.7	39	78	32.3	53.6	0	0	0	27.6	52.5	347.4	59.9
WILSON	1980	90.5	8.6	51.7	105.3	454.1	19.1	1.7	8.8	5.9	18.2	197.2	27.6
WILSON	1981	3.7	2	106.3	323.4	144.9	30.7	9.6	30.4	43.9	41.7	40.2	59.9
WILSON	1982	2.4	14.1	31.2	192.9	164.4	8.4	13.5	3.1	15.9	186.4	220.1	188.9
WILSON	1983	1.8	128	43.4	137.1	38	31	22.5	29.8	3.6	63.6	22.4	225.7
WILSON	1984	7.6	1.6	5.3	87.3	1.6	5	12.8	22.4	13.9	144.8	123.9	85.6
WILSON	1985	0	91.2	88	188.8	59.7	32.4	50.2	3.1	22.5	20.6	67.5	105
WILSON	1986	17.1	0	65.2	284.5	300.1	3.7	0.5	1.6	1	22.8	157.3	143.5
WILSON	1987	40.6	13.6	23.9	278.7	109	71.2	15.7	8.4	15.2	1.9	125.3	25.8
WILSON	1988	78.5	28.4	181.2	322.7	151.1	103.6	7.3	13.1	30.2	9	66.7	123.5
WILSON	1989	95.7	25.1	65.1	277.4	168.3	2.8	59.2	19.5	11.1	45.8	103.5	201.4
WILSON	1990	46.2	28.8	271	171.9	107.6	17	6.6	11.1	6.2	34.7	102.6	69.5
WILSON	1991	0	2.4	151.9	114.2	144.2	30.6	2.6	1	4	28.5	149.6	65.2
WILSON	1992	1.5	15.1	27.4	414.6	56.8	22.6	88.1	8.7	4.9	37.5	80.1	96.2
WILSON	1993	270.4	104	9.2	9.6	122.9	49.4	0	12.8	0	50.2	128.8	78.2
WILSON	1994	12	NA	54.5	172.3	133.3	73.6	10.2	40	2.3	69.4	230.9	50.3
WILSON	1995	46.6	65.4	136.5	80.2	122.3	85.1	18.1	22.1	22.2	117.2	127.3	39.8
WILSON	1996	6.9	40.2	135.5	95.3	60.1	77	13.2	24	3.8	5.3	161.5	0
WILSON	1997	0	0	15.8	318.1	130.7	6.9	7.4	27.2	0	102.1	275.3	99.8
WILSON	1998	434.4	112.2	75	84.8	464.6	63.4	62.9	13.2	11	0	58.9	29.7
WILSON	1999	3	0	126.6	156.3	10.6	1.5	4.2	31.9	17.8	33.2	242.3	125.7
WILSON	2000	9.8	0	32.7	85.4	52.7	54.9	3	4.2	23.5	43.9	140.3	78.9
WILSON	2001	480.7	6.3	339.2	104.7	87.4	66.1	35	16.7	15.9	66.9	212.4	10.1
WILSON	2002	63.2	13.1	82.2	141.1	117.6	0	6	3.3	25.6	75.5	109.3	315.4
WILSON	2003	31.5	4.2	26.6	195.5	368.3	8.5	0.6	60.3	60.3	52.1	106.9	21.2
WILSON	2004	49.2	63.3	88.2	295.3	79.8	6	0	0	11.1	58	121.8	74.1
WILSON	2005	49.2	14.5	30	157.1	285.2	6.6	0	5.8	15.8	27.5	73.6	4.7
WILSON	2006	9.2	42.3	143.2	249.8	89.2	9.2	3.9	28.1	67.5	26.3	293	263.8
WILSON	2007	53.3	104.9	21.6	176.1	60.3	75.4	19	21.9	63.5	29.7	87.3	51
WILSON	2008	51.6	24.7	172.6	95.1	19.1	1.4	40.1	6.9	64.7	133.3	248.3	1
WILSON	2009	59.4	15.3	19.4	83.1	111.5	52	11.4	0.1	6.9	84.6	91.3	175.9
WILSON	2010	73.5	116.6	256.7	106.6	186.9	48.5	1	23.9	34.8	117.6	79	50.6
WILSON	2011	10.4	77.8	144.6	46.8	45.4	102.2	10.7	71	33.4	145	202.3	101

## Sheet: Table S3
Table SIII Raw minimum temperature data
Weather station	Year	January	February	March	April	May	June	July	August	September	October	November	December
AMBOSELI	1980	11.4	11.6	12.6	14.6	14.1	9.2	9.1	10.7	11	13.1	14.9	14.2
AMBOSELI	1981	13.5	15.5	16.6	16.9	16	12	11.2	13.6	13.5	14.7	15.4	16.4
AMBOSELI	1982	13.8	15	15.7	16.6	16.3	13.7	12.1	11.4	14	14.6	16.7	15.8
AMBOSELI	1983	14.4	15	16.1	15.8	15.5	13.9	11.2	11.8	12.1	13.9	14.8	15
AMBOSELI	1984	14.5	13.9	15.1	15.4	12.5	11.6	11.1	11.5	11.1	14.4	16.2	15.1
AMBOSELI	1985	13.7	16.3	14.3	14.8	14	11.2	10.4	11.2	12.3	14.2	15.7	15.7
AMBOSELI	1986	15.7	13.6	15.8	15.5	16.1	12.1	10.3	9.6	12.4	16.9	17.1	14.6
AMBOSELI	1987	13.4	13.6	15.1	14.9	14.9	13.8	12.3	13.1	13.1	15	15.5	14.7
AMBOSELI	1988	17	16.6	17.6	17.6	14.3	12.5	11.4	11.9	13.1	14.1	16.5	15
AMBOSELI	1989	16.4	14.3	14.9	15.4	15.1	10.9	10.7	12	12.4	14.3	15.9	17
AMBOSELI	1990	14.3	15.9	16.6	16.6	15	11.4	10.9	12.5	12.2	14.5	16.4	17.4
AMBOSELI	1991	14.6	14.9	15.7	15.6	16.8	13.9	12.3	12.6	12.1	14.6	16.4	16.8
AMBOSELI	1992	15.9	16.2	16.7	16.9	15.3	13.9	12.5	12.4	13.6	15.2	15.6	15.4
AMBOSELI	1993	15.9	14.3	14.3	15.5	15.5	13.7	11.6	11.7	12.5	14.3	16.4	16.7
AMBOSELI	1994	14.8	15.6	16.5	15.5	15.6	12.6	12.9	13.2	13.3	15.8	16.5	15.7
AMBOSELI	1995	14.9	15	15.7	16	15.3	13	11.7	12.4	13.7	15.5	15.7	14.7
AMBOSELI	1996	15	16.5	16.4	16	14.7	13.1	11.8	12.1	13.6	13.8	16.3	15.1
AMBOSELI	1997	14.8	15.1	15.9	16.7	14.8	13.6	12.2	12.8	12.1	15.7	16.4	17.3
AMBOSELI	1998	17.3	15.9	15.2	17.3	16	12.2	10.9	12.4	12.7	13.4	14.3	14.8
AMBOSELI	1999	14.7	14.3	16.4	16.1	14	12.4	11.8	13.6	13.1	13.5	16.3	16.3
AMBOSELI	2000	13.1	13.7	16.3	15.7	14.5	12.2	12.4	12.7	12.8	14	16.2	16
AMBOSELI	2001	15.9	15	15	16.3	15	13.9	11.4	12.5	13.3	14.3	16.8	15.1
AMBOSELI	2002	16.4	15.7	16.7	17.3	16.1	13.1	12.3	13.8	14.2	14.9	16.7	17.5
AMBOSELI	2003	14.6	14.3	16.1	16.5	17	13.7	12.2	12.5	13.9	15.3	16.5	14.6
AMBOSELI	2004	16	16.6	16.9	17	15.4	12.7	11.2	12.2	13.9	14.3	16.8	16.2
AMBOSELI	2005	14.3	14.6	16.5	15.8	15.5	13.3	12.1	12.9	12.6	13.5	15.6	14.3
AMBOSELI	2006	14.5	15.5	16.4	15.9	15	12.5	12.3	12.4	13.4	14	17.1	16.7
AMBOSELI	2007	14.6	14	14.9	15.3	15.4	12.3	11.6	13.4	13.2	13.9	15.3	15.6
AMBOSELI	2008	14.4	15.1	16.3	15.3	14.2	12.2	11.3	12.2	13.1	14.7	16	14.8
AMBOSELI	2009	14.8	15.9	16.4	16.1	15.9	13.6	10.8	12.4	13.1	15.2	16.4	16.7
AMBOSELI	2010	15.9	16.5	16.6	16.6	15.7	12.9	11.6	12.6	12.6	14.5	15.4	14.5
AMBOSELI	2011	13.4	13.5	15.8	15.1	15.7	13.4	11.4	12.6	13.9	15.4	15.7	16.2
AMBOSELI	2012	13.7	14.7	15.4	16.5	14.9	12.8	11.3	11.8	13.2	14.3	15.4	15.7
GARISSA	1980	22.1	23.5	24.2	25.4	24.4	21.8	21.6	21.3	21.3	23.3	24.2	24.2
GARISSA	1981	23.8	23.7	24.4	24.2	22.6	21.9	21.4	21.9	21.9	23	22.5	22.4
GARISSA	1982	22.4	22.4	23.1	22.5	21.7	18.9	18.1	18.2	18.2	21.9	23.3	22.5
GARISSA	1983	22.7	23.6	24.2	25.1	22.9	22.5	22	22	22	23.6	23.4	23.6
GARISSA	1984	22.6	22.2	24	25.1	23.5	21	21.1	21.2	21.2	23.1	23	22.2
GARISSA	1985	22.5	23.4	22.9	24.5	23.4	21.6	21.2	21.5	21.5	22.8	24.2	23.7
GARISSA	1986	22.8	23.1	25.3	24.3	22.6	22.3	21.2	21	21	23.9	24.4	23.2
GARISSA	1987	22.5	23.3	24.5	24.7	24.3	22.8	21.7	21.6	21.6	24	24.5	24.5
GARISSA	1988	24.8	24.9	25.4	25	24	22.4	22.1	22	22.1	23.5	22.3	23.4
GARISSA	1989	23	22.9	24.6	23.8	23	21.6	21.7	21.2	21.2	23.1	23.5	22.9
GARISSA	1990	22.6	24.2	24.7	23.9	23.4	21.2	20.9	21.2	21.2	23.2	23.9	22
GARISSA	1991	23.3	23.8	24.5	24.5	23.2	22.8	21.8	21.1	21.9	25.8	24.1	23.9
GARISSA	1992	21	25.3	25	25.5	24.2	22.5	21.2	20.5	22.1	23.1	23.7	23.7
GARISSA	1993	22.9	23.3	24.2	25.2	24.5	22.1	21.3	21.1	21.2	23.1	23.9	23.7
GARISSA	1994	23.5	23.4	24.7	24.9	23.8	22.2	21.3	21.9	22.2	23.7	23.2	23.1
GARISSA	1995	22.5	23.9	24.9	24.9	23.7	22.4	21.8	21.9	22	23.7	24	23.1
GARISSA	1996	23.7	24.5	25.1	25	23.8	22.8	21.8	21.5	22	23.2	23.9	NA
GARISSA	1997	NA	23.5	25.1	24.9	23.3	22.8	21.8	22.2	22.8	23.7	23.6	23.5
GARISSA	1998	23.6	24.2	25	24.5	23.5	22	21.4	20.7	21.6	22.9	23.5	23.4
GARISSA	1999	23.5	23.6	24.9	23.2	22.1	20.6	21.4	21.3	21.9	22.6	23.8	22.6
GARISSA	2000	22.1	22.6	24.5	24.4	23.1	21.6	21.4	21.3	21.5	23	24.2	24.1
GARISSA	2001	23.8	24.1	24.8	24.8	23.9	22	21.2	21.5	22.3	23.5	24.1	23.7
GARISSA	2002	23.7	23.4	25.4	24.3	23.4	22.6	20.5	21.2	21.9	23.6	23.7	24.1
GARISSA	2003	NA	NA	NA	NA	NA	NA	NA	NA	NA	NA	NA	NA
GARISSA	2004	NA	NA	NA	NA	NA	NA	NA	NA	NA	NA	NA	NA
GARISSA	2005	22.1	23.2	24.7	26	NA	NA	21.6	21.4	22.3	23.5	24.3	23.8
GARISSA	2006	24.1	24.4	25.5	24.9	23.8	22.8	22	21.9	22	23.5	23.7	23.8
GARISSA	2007	23.3	24	25.5	25.9	24.2	22.6	22.1	22.3	22.4	23.5	23.8	23.3
GARISSA	2008	23.4	23.1	24.8	24.6	23.5	21.7	21.6	22.2	22.7	24.3	24	24.1
GARISSA	2009	23.6	24.1	25.1	25.4	24.6	23.3	22.1	22.5	22.9	23.8	24.2	24.7
GARISSA	2010	24.2	25.1	25.6	25.3	24.1	23.6	22.3	22.5	22.4	23.7	24.7	24.3
GARISSA	2011	23.4	23.8	24.6	25.6	24.7	23.7	22.8	22.6	23.3	22.3	24.1	23.7
LAIKIPIA	1997	NA	NA	NA	12.2	9.2	10.4	10.1	9.2	8.7	13	13.2	12.8
LAIKIPIA	1998	12.9	10.1	NA	11.9	12	9.6	9.6	NA	9.2	9.4	10.4	7.1
LAIKIPIA	1999	7.9	7.6	10.7	10.1	10.4	9.6	9.6	10	9.2	10.1	10.2	10.3
LAIKIPIA	2000	7.8	8.3	9.9	11.1	11.5	10.8	10.5	10.8	10.2	11.1	11.9	10.7
LAIKIPIA	2001	11.7	9.8	11.2	12.2	11.9	10.2	9.6	10.4	9.2	10.6	12	9.7
LAIKIPIA	2002	9.7	9.5	10.9	11.9	11.7	9.7	9.6	10.2	10.1	10.8	11.3	12.2
LAIKIPIA	2003	8.6	9.7	10.5	11.8	12.8	10.6	9.8	10.5	9.7	10.3	11.5	8.9
LAIKIPIA	2005	9.9	9.5	11.1	11.8	12.4	10.9	10.4	10.4	11	10.5	10.3	9.1
LAIKIPIA	2006	9.1	9.9	11.2	11.9	10.6	10.6	10.8	10.9	10.2	11.2	13.1	12.2
LAIKIPIA	2007	9.4	10.2	10.1	11.3	11.4	11.3	10.6	10.7	10.7	11.2	11.2	9.2
LAIKIPIA	2008	9.2	9.8	11	11	10.9	9.7	11	10.5	10.4	12.1	11.4	9.1
LAIKIPIA	2009	9.6	10.4	11.2	11.5	11.7	10.4	10.6	10.5	10.5	12.5	11.6	11.8
LAIKIPIA	2010	10.8	12.2	13.5	12.6	12.6	11.3	10.6	11	10.1	11.2	10.5	8.6
LAIKIPIA	2011	8.8	9.2	10.7	11.1	11.4	10.3	10.2	10.9	10.9	11.1	12.6	9.9
MACHAKOS	1988	14	14.3	14.1	14.7	13.1	12	11	11.2	11.3	12.4	13.4	13.6
MACHAKOS	1989	12.6	11.5	12.9	13.3	12.4	10.5	9.8	10.3	11.1	13	15.1	15
MACHAKOS	1990	13.6	14.7	15.5	15.3	14.4	11.5	10.3	11.9	11	14.1	15	13.9
MACHAKOS	1991	12.3	12.4	14.2	14.6	15.1	13	11.6	10.6	10.8	13.6	14.6	14.3
MACHAKOS	1992	13.3	13.2	15	15.5	13.6	12.5	11.1	11	11.4	13.5	14.6	14.4
MACHAKOS	1993	14.2	12.8	13.2	15.2	13.9	13.5	10.6	11.5	10.6	13.6	14.8	14.5
MACHAKOS	1994	13.3	13.4	14.7	15	14.2	11.6	11.2	12	12.1	14.2	14.5	13.7
MACHAKOS	1995	12.8	12.9	14.4	14.7	13.9	10.9	10.3	10.5	11.5	13.5	13.6	13.5
MACHAKOS	1996	12.5	13.3	14.6	14.3	13.7	12	10.6	10	10.8	12.5	14.2	12.9
MACHAKOS	1997	13.4	13.2	14.8	14.9	13.1	12.3	11.2	11.3	12.1	13.6	14.8	14.7
MACHAKOS	1998	14.9	14.3	14.6	15.3	14	11.6	10.2	11.2	11.4	12.5	14.3	13.9
MACHAKOS	1999	14	13.7	15.5	14.8	13.6	12.1	12	12.6	12.5	13.3	14.7	14.6
MACHAKOS	2000	12.6	12.1	15	14.5	13.5	12.4	11.8	11.8	11.7	13.4	15.4	14.7
MACHAKOS	2001	14	14.3	14.3	15.2	14	12	10.9	11	12.5	13.6	14.6	14.4
MACHAKOS	2002	14.1	13.9	15.3	15.8	14.2	12.2	10.9	12.3	12.2	14.1	15.1	15.2
MACHAKOS	2003	12.9	12.4	13.3	14.1	14.4	11.9	10.1	10.4	12	13.3	13.8	13.1
MACHAKOS	2004	13.9	14.4	14.7	15.2	13.3	11.2	9.4	10.7	12.1	13.7	14.6	13.9
MACHAKOS	2005	13	13.6	15.3	14.7	14.1	12.1	10.9	11.2	11.7	13.5	14.5	14.1
MACHAKOS	2006	13.4	13.3	14.6	14.9	13.9	12.1	11.5	11.7	12.3	14	14.9	14.9
MACHAKOS	2007	13.5	13.2	14	15	13.8	11.1	10.8	12.2	11.5	13.5	14.4	13.5
MACHAKOS	2008	12.8	13.4	15.2	14.6	13.3	12	11.4	11.9	12.1	14.8	14.9	13.9
MACHAKOS	2009	13.7	14.4	15.1	15.7	14.7	12.8	10.6	11.8	12.7	14.5	15.5	15.4
MACHAKOS	2010	14.8	15.7	15.4	15.8	14.4	12.5	10.9	12.1	12.2	13.8	15.3	14
MACHAKOS	2011	13.5	13.5	14.9	16	15	13.5	11.2	12.8	13.4	15.4	15.4	15.2
MAKINDU	1980	16.7	17.5	17.9	19	16.9	14.3	13.6	14.1	16	16.8	18.5	18.1
MAKINDU	1981	18	18.3	18.3	18.1	17	14.2	13.3	14.5	15.3	17.2	18.1	18.2
MAKINDU	1982	18.4	18.5	18.7	17.1	17.5	15.5	14.9	14.6	15.8	17.3	18.1	18
MAKINDU	1983	18	19.7	17.1	19	17.8	16.8	14.8	15.6	16	17.5	18.8	17.5
MAKINDU	1984	16.7	17.5	18.4	18.9	16.9	14.6	14.8	14.3	15.5	17.4	18.1	17.5
MAKINDU	1985	17.6	18.4	17.8	18.2	17	15.5	14.2	14	15.7	16.8	18.3	18.1
MAKINDU	1986	18	17.7	18.9	19.5	17.6	15.1	13.9	13.9	15.3	18.1	18.2	18.4
MAKINDU	1987	17.7	17.8	19.3	19.2	17.9	16.3	15.5	15	16.4	17.5	18.6	19.4
MAKINDU	1988	19.3	19.4	19.1	19.3	17.1	15.8	15.2	15.5	15.8	17.3	18.2	18.1
MAKINDU	1989	17.6	28.3	18.3	17.3	16.8	14.4	14	14.4	15.8	17.2	18.6	18.2
MAKINDU	1990	17.7	18.9	18.7	18.7	17.1	14.2	13.7	14.4	15	17.1	18.3	18.1
MAKINDU	1991	17.7	17.3	18.2	18.7	18.1	15.9	14.8	14.8	15.3	17.6	18.3	17.9
MAKINDU	1992	17.7	18.2	18.6	19.1	17.3	15.8	14.8	14	15.4	16.9	17.9	17.9
MAKINDU	1993	16.6	17.2	17.8	18.7	15.7	16	13.6	14.9	14.2	17.2	17.5	18.5
MAKINDU	1994	18.1	18.1	19.2	18.7	17.4	15.5	14.7	15.2	16.1	18	18.3	17.9
MAKINDU	1995	17.3	17.7	18.4	18.6	17.7	15.4	14.4	14.9	16.1	18.1	18.5	18.5
MAKINDU	1996	18.6	19.1	19.4	18.4	17.2	16	15	14.9	16.2	17.1	18.2	17.6
MAKINDU	1997	17.4	17.7	19	19.1	17.5	16.3	14.8	15.1	16.6	17.9	18.9	18.9
MAKINDU	1998	19	19.2	19.9	19.4	17.6	15.8	14.2	15.2	16	16.6	17.9	18.6
MAKINDU	1999	18.6	17.8	19.4	18.4	17	15.7	14.6	15.6	16.1	16.8	18	18.2
MAKINDU	2000	16.7	16.9	19.2	18	17.1	15.2	14.5	14.9	15.3	16.8	18.7	18.7
MAKINDU	2001	18	18.5	18.7	18.9	17.4	15.5	14.3	15	16.6	17.3	18.6	18.5
MAKINDU	2002	18.1	17.9	19.8	19.3	17.3	15.6	15.9	15.4	16.2	17.8	18.9	19.2
MAKINDU	2003	18	18.4	19.2	19.3	18.4	16.3	14.7	15.4	16.7	18.2	18.8	17.8
MAKINDU	2004	18.8	18.5	19.1	19	17.2	14.6	13.1	14.1	16	17.7	18.8	18.6
MAKINDU	2005	18.4	18.8	19.3	19.3	18.6	15.8	15	15.5	15.6	16.9	18.7	18.5
MAKINDU	2006	18.5	19.1	19.9	18.6	19.1	15.3	14.5	15.1	16.7	17.9	18.6	18.7
MAKINDU	2007	17.6	18	18.7	18.9	17.4	14.9	13.7	14.9	15.7	17.2	18.6	17.4
MAKINDU	2008	17.2	17.3	18.8	17.7	16.4	15.1	14.4	15	15.8	18	19	18.7
MAKINDU	2009	18.4	19.4	19.7	19.3	18.4	16.5	14.5	15.5	16.5	18.4	19.2	19.5
MAKINDU	2010	19	19.5	19.3	19.1	18	14.6	14.2	14.6	15.6	17.4	18.8	18.2
MAKINDU	2011	17.9	18.1	18.7	18.9	17.9	16.1	14.6	14.9	16.6	18.4	18.8	18.6
MERU	1980	11.1	11.3	12.8	14.3	14.1	11.5	11.4	11.9	12.3	13.8	13.6	12.2
MERU	1981	10.9	11.6	14.5	14.4	13.9	12.3	12.2	12.7	12.8	14	13.2	11.7
MERU	1982	10.7	11.6	11.8	14.6	14.8	12.4	12.2	12.6	12.7	13.8	14.1	12.7
MERU	1983	11.8	13.5	13.6	15.3	15.1	14	13	12.8	12.8	14.1	13.7	12.6
MERU	1984	10.8	10.5	13.3	14.2	13.5	11.5	12.5	12.3	12.6	13.8	13.2	11.5
MERU	1985	11.2	12.3	13.6	14.5	14.2	12.3	12.2	11.8	12.9	13.4	13.8	11.8
MERU	1986	11.5	11.5	13.4	15	14	12.9	11.3	11.5	12.2	13.7	14.2	12.7
MERU	1987	11.8	12.3	13.4	14.5	14.4	12.6	11.9	12.3	13.1	14.5	14.8	11.9
MERU	1988	13.1	13.4	14.2	15.5	14.1	13	12.7	13.2	13.2	13.8	13.4	12.2
MERU	1989	12.4	11.6	15.6	14.1	12.6	12.2	11.9	11.9	12.9	13.4	12.9	12.2
MERU	1990	11.8	12.9	14.1	14.1	13.8	12.1	11.9	12.7	12.7	13.7	13.3	12.1
MERU	1991	11.2	11.4	13	14.1	14.6	13	12.5	11.9	11.3	12.7	13.5	12.1
MERU	1992	11.8	10.9	12.8	14.2	13.2	12.3	12.2	11.3	11.7	13.3	13.1	12.2
MERU	1993	12	11.7	11.7	14.1	14.1	13.2	11.6	11.7	11.8	13.7	14.6	12.4
MERU	1994	11.1	11.5	12.9	14.7	14.1	12.8	11.9	12.5	12.1	14	13.7	12.3
MERU	1995	11	12.1	14	14.7	13.8	12.9	12.5	12.7	13.3	14.5	14	12.8
MERU	1996	12.1	12.4	14.7	14.1	15.2	13.9	12.7	12	12.7	13.7	14.7	11.6
MERU	1997	11.8	10.9	14.2	14.4	12.4	13.2	12.3	12.3	12.9	14.7	14.9	14.1
MERU	1998	14.5	13.5	13.8	15	14.6	12.7	12.2	12.7	12.8	13	13.5	11.6
MERU	1999	11.4	11	13.8	13.3	13.2	12.3	11.8	12.3	12.1	13.7	13.6	12.1
MERU	2000	9.7	10.1	11.9	13.3	12.7	12.4	11.9	11.5	13	14.2	15	13.2
MERU	2001	13.3	12.3	13.9	14.8	14.5	12.8	12.1	11.9	12.9	14.1	14.3	12
MERU	2002	12	11.5	13.7	15	18.7	12.7	12.1	12.9	12.8	14	13.8	13.9
MERU	2003	11.1	11.5	12.8	14.5	14.5	13.3	11.9	12.2	13.1	13.8	14	11.4
MERU	2004	12.8	12.8	13.2	14.7	13.2	12.3	11.4	12.4	13	14.5	13.7	12.8
MERU	2005	11.3	11.1	13.9	14.4	14.8	13.6	12.4	12.4	12.9	13.4	14.2	11.2
MERU	2006	11.2	12	14.1	14.4	13.9	12.3	12.6	12.8	13.2	14.4	14.1	13.4
MERU	2007	12	12.7	13	14.7	14.1	12.9	12.8	13.1	12.9	14.5	13.6	11.9
MERU	2008	11.6	11	13.5	13.8	14.1	12.6	12.8	13.1	12.9	14.8	13.4	11.6
MERU	2009	11.4	12.1	13.2	14.4	14.4	13.3	11.7	12.8	13.5	15	14	13.4
MERU	2010	12.8	14.5	14.2	14.7	13.7	12.8	13	12.8	14.8	13.9	11.4	11.4
MERU	2011	10.9	11	13.1	14.8	15	14	12	13.3	13.7	14.4	14.5	12.2
NAKURU	1984	6.8	6.3	8.6	11	9.8	9.3	10.1	9.8	11.4	9.6	10.5	9.1
NAKURU	1985	8.7	10.5	10.6	12.5	11.7	10.5	9.6	9.2	8.3	9	9.5	8.6
NAKURU	1986	7.9	7.4	8.9	11.9	11.1	11	9.1	8.2	8.5	9.5	10.4	10.7
NAKURU	1987	10.7	10.7	11.6	12.3	12.8	11.8	9.9	11.2	9.6	10	11.9	9.3
NAKURU	1988	11	10.5	12.3	13.7	12	11	11.1	10.9	11	9.5	10	9.6
NAKURU	1989	10.3	9.3	10.1	11.7	11.4	10.5	11.2	10.5	10.3	10.3	10.9	11.1
NAKURU	1990	9	11.1	11.9	12.8	11.8	10.3	10.3	10.9	9.4	9.9	10.1	9.8
NAKURU	1991	10	10.1	11	11.6	12.6	11.5	11.4	10.3	9.5	9.6	9.6	10.2
NAKURU	1992	10	10.9	11.2	12.4	11.7	11.8	10.9	11.1	10.1	10.6	9.2	10.6
NAKURU	1993	11	10.6	9.2	10.9	12.6	12.3	11.9	10.4	10.3	10.2	10.7	10.5
NAKURU	1994	10.3	10.8	12	13.1	11.9	12.2	11.7	11.5	9.9	10.3	12.2	10.8
NAKURU	1995	9.9	11	12	12.5	12.6	12.3	11.7	11.3	11.4	11	11	9.2
NAKURU	1996	9.6	11.7	11.8	12.1	13	12.9	11.5	11	10.5	10.1	10.8	9.7
NAKURU	1997	10	9.5	11.1	13.4	11.3	11.8	11.6	10.6	9.5	12.4	13.4	13.6
NAKURU	1998	13.4	11.9	12.5	13.9	14.4	12.3	12.7	12.1	11.6	11.9	10.3	8.8
NAKURU	1999	10.4	9.7	12.6	12.6	12	11.9	11.9	12.1	11.3	11.7	12.1	11.2
NAKURU	2000	10.9	10.5	12	13.4	13	12.7	13.1	12.1	11.7	12	11.9	11.2
NAKURU	2001	12.8	11	12.4	13.4	13.1	12	11.9	11.7	10.5	11.9	12.4	11
NAKURU	2002	11.7	10.9	12.4	12.9	12.8	11.5	11.1	12	10.5	11.5	12.6	12.6
NAKURU	2003	10.3	11.1	11.8	13.4	13.9	13.1	12.4	12.4	11.2	11.4	12.2	10.5
NAKURU	2004	11.7	12.3	12.2	13.6	12.1	11.5	11.1	11.6	11.4	11.1	11.3	11.2
NAKURU	2005	10.7	10.7	12.1	12.2	12.9	11.8	11.3	11.9	11.9	10.9	10.9	10.2
NAKURU	2006	10.5	11.6	12.9	13.4	12.6	12.2	12.8	12.2	12	11.9	13.4	13.4
NAKURU	2007	12.1	12.2	11.1	12.7	13.2	13.3	12.4	12.1	11.8	10.4	11.3	10.5
NAKURU	2008	10.9	11.6	12.5	12.2	12.3	12.6	12.7	12.6	12.1	12.4	12	10.8
NAKURU	2009	11.6	11.8	12.5	13.2	13.5	11.7	12.1	12.7	12.3	13.3	12.3	12.7
NAKURU	2010	12.2	13.6	13.4	13.5	13.8	12.8	12.7	12.8	12.1	12.8	11.5	11
NAKURU	2011	10.7	11.1	12.6	12.3	12.6	13.1	11.9	12.6	12.2	12.2	13.3	11.7
NAROK	1984	6.5	5.6	6.4	10.1	8.4	7.5	8.1	7	5.9	8	7.7	6
NAROK	1985	4.9	8.9	9.5	11.6	12.3	9.7	8.4	8	7.9	9.1	8.8	8.1
NAROK	1986	8.2	7.4	8.9	12	12.2	9.4	6.9	5.9	7.5	8.8	9.6	9.9
NAROK	1987	9.8	8.7	9.3	10.8	12.1	10.3	7.8	8.9	8	8.2	10.4	6.9
NAROK	1988	9.5	8.5	10.6	11.7	12.1	8.7	8.7	8.6	9.9	8.3	8	7.8
NAROK	1989	10	7.7	8.9	11.5	12.1	8.8	8.6	8.6	9	8.3	9	9.9
NAROK	1990	7.5	9.9	11.4	12.6	11.8	8.4	7.2	8.7	6.9	8.8	8.4	8.3
NAROK	1991	8.5	8.9	9.3	10.9	13.2	10.2	8.4	8.2	6.7	8.6	8.3	9.2
NAROK	1992	7.8	10.1	9.5	12.2	11.7	10.9	8.6	8.8	9.3	9.2	8.6	9.3
NAROK	1993	10.4	9.4	7.9	9.9	11.8	11	7.4	7.7	7.2	8.9	8.8	8.4
NAROK	1994	8.8	9.5	10.6	11.9	12.5	10.2	9.9	8.9	7.4	9.3	7.7	8.8
NAROK	1995	8.7	9.6	10.8	11.8	12.6	10.7	9.7	8.9	9.3	10.1	12.4	8.2
NAROK	1996	9	10.5	10.7	12.4	12.6	12.1	9.3	8.7	8.5	9.5	9.7	8.3
NAROK	1997	9	8.4	9.3	13.1	11.9	11.2	9.9	8.7	7.5	12.3	12.7	13.2
NAROK	1998	12.6	11.9	10.6	14	14.3	11.6	10.3	9.3	9.1	9.8	8.2	6
NAROK	1999	9.1	7.3	11.3	13.3	11.3	14.7	9.6	10.3	9.1	9.6	10.8	9.4
NAROK	2000	7.4	7.4	9.4	11.9	10.8	11.1	9.9	9.2	9.6	10.3	10.7	11.1
NAROK	2001	12	9.2	9.5	12.6	12.3	10.4	8.4	8.3	8.7	10.8	10.1	8.5
NAROK	2002	10.9	9.1	10.4	12.6	12.2	8.3	7.6	9.7	8.2	11.2	11	10.8
NAROK	2003	8.9	8.6	8.9	11.7	13.4	11.4	8.7	9.7	9.9	9.9	9.4	8.2
NAROK	2004	9.9	10.3	11	13.3	11.5	9	7.2	8.1	9.6	10.7	10.1	10.4
NAROK	2006	8.6	9.1	11.7	13.3	12.3	9.8	10.2	9	10.8	11.6	12.5	12.5
NAROK	2007	11.4	10.8	10.1	11.8	12.6	11.6	9.5	10.6	10	9.3	8.6	8.9
NAROK	2008	8.9	9.9	10.7	11.8	11.3	10.2	9.9	10.3	10.4	11.5	10.5	8.7
NAROK	2009	9.8	10	10.9	12.8	13.1	10.3	8	14.6	10.6	12.8	11.2	11
NAROK	2010	10.8	12.6	11.5	13.4	13.3	11.1	9.7	10.3	10.1	11.7	9.7	10.1
NAROK	2011	9.3	10.1	11	12.1	12.2	11.9	10	11.3	10	11.3	12.1	11.7
VOI	1983	20.6	21.5	20.9	21.5	20.5	19.6	18.4	18.4	18.6	19.6	20.4	20.8
VOI	1984	19.7	19.7	20.5	21.6	19.8	18.1	17.8	17.5	17.8	19.6	20.4	20.7
VOI	1985	20.6	20.9	19.9	20.7	20.1	18.8	17.6	17.5	18.1	18.8	20.4	20.6
VOI	1986	20.2	19.7	21.2	21.2	20.3	18.3	17.6	17.4	17.9	19.9	20.8	21
VOI	1987	20.2	19.9	20.3	21.1	20.6	19	17.8	18	18.5	19.7	20.7	21.8
VOI	1988	21.6	21.8	21.7	21.4	20.2	19.2	28.3	18.3	18.5	19.2	20.3	20.8
VOI	1989	20.6	20	21.1	20.7	19.8	18.5	17.7	17.6	18.5	19.2	20.1	21.1
VOI	1990	20.5	21.5	20.9	21.4	20.2	18.1	17.4	17.4	18.2	19.2	20.5	20.9
VOI	1991	21.6	20.1	20.5	21.5	21.2	18.6	17.8	17.2	17.6	19.2	20.5	20.6
VOI	1992	20.2	20.6	20.7	22	20.4	19.2	17.9	17.3	18.2	19	20.4	20.7
VOI	1993	20.6	19.8	20.1	20.9	20.5	19	17.5	17.5	17.3	19.3	20.3	21
VOI	1994	20.8	20.8	21.5	21	20.1	18.6	17.9	17.8	18.4	20.5	20.5	20.9
VOI	1995	20.4	20.7	21.2	21.3	20.6	19	18.1	18	18.2	19.8	20.5	20.6
VOI	1996	20.6	21.6	21.6	20.8	20.1	18.9	17.7	17.3	18.3	18.8	19.9	20.6
VOI	1997	20	20	21.2	21	19.8	19.4	18.2	17.9	18.6	19.8	20.7	20.9
VOI	1998	21.3	21.8	21.8	21.5	20.3	18.9	17.6	17.9	18.5	18.6	20	21
VOI	1999	20.8	20.2	21.5	20.7	19.6	18.5	18	17.8	18.2	18.8	20.7	20.5
VOI	2000	20.3	19.1	21.2	20.7	20	18.7	17.9	17.8	17.6	18.9	21	21.3
VOI	2001	20.6	20.7	21.2	21.3	20.4	19	18	17.9	18.2	19.1	NA	21.2
VOI	2002	20.8	20.1	21.9	21.5	20.2	19	18.3	17.9	18.5	19.9	20.4	21.4
VOI	2003	20.4	20.9	20.9	21.6	21.4	19.4	18.2	17.8	19.1	20.2	21.1	21.5
VOI	2004	21.6	21.4	21.7	21.2	20.6	18.8	17.7	17.5	18.8	19.8	20.4	21
VOI	2005	20.6	21.2	21.4	21.5	20.9	19.5	18.5	18.4	18.5	19.4	21	21.1
VOI	2006	20.8	21.9	21.9	21.4	20.4	19	18.5	18.5	18.9	19.9	21.1	21.3
VOI	2007	21.1	20.8	21.3	21.5	20.9	19.1	18.5	18.6	19.2	19.5	21.1	21.1
VOI	2008	20.9	20.4	21.4	20.7	20	18.5	18.2	18	18.5	20.3	21.5	21
VOI	2009	20.3	21.3	21.7	21.7	21	20	18.2	18.4	18.8	20.2	20.9	21.6
VOI	2010	20.5	21.3	22	21.9	21.1	20.1	18.3	18.5	18.5	19.7	21.2	21
VOI	2011	21	21	21.4	21.5	20.7	19.9	18.7	18.6	19.3	20.2	20.6	21.7

## Sheet: Table S4
Table SIV Raw maximum temperature data
Weather station	Year	January	February	March	April	May	June	July	August	September	October	November	December
AMBOSELI	1980	29.8	30.3	31.7	31.1	29.3	27.6	26.8	27.5	31.2	32.5	29.5	24.1
AMBOSELI	1981	25.5	25.5	27.3	27.4	26.1	26.6	25.1	27.1	29.2	30.8	30	28.5
AMBOSELI	1982	31.9	35.3	34.6	30.1	29.3	28.4	30.6	30.2	31.3	31.7	32.9	30.9
AMBOSELI	1983	34.8	34.6	35.3	33.7	31.8	31.2	30	31.5	32.8	33.8	34	32.9
AMBOSELI	1984	33	36.1	34.7	34.5	32.7	31.8	29.8	29.7	32.8	32.3	31.4	32
AMBOSELI	1985	33.7	33.8	33.5	31.4	30.6	28.9	29.3	28.8	31.1	31.3	31.3	31
AMBOSELI	1986	33.9	35.4	34.5	32.4	30	29.8	29.6	30	31.4	33.4	30.8	30.7
AMBOSELI	1987	33.1	35	35.5	33.4	32.5	31.5	30.3	30.7	33.4	33.6	33.4	34.2
AMBOSELI	1988	34.1	36.4	35.8	33.1	33	32.1	31.2	31.7	33.9	35.4	32.6	33
AMBOSELI	1989	32.6	34.3	35.7	31.9	31.6	31.2	31.4	31.4	33.1	33.9	31.9	32.1
AMBOSELI	1990	32.1	34.6	32.4	32.4	33.4	32	30.7	29.9	33.6	35.4	33.4	31
AMBOSELI	1991	35.4	36.9	36.4	33.8	31.9	32.2	31.5	31	33.5	35.4	32.9	32
AMBOSELI	1992	37.5	41.7	39.5	39.3	35.4	35.2	33.1	33.6	36	39.2	37.3	37.5
AMBOSELI	1993	35.7	37.5	40	39.5	40.4	36.5	33.6	35.2	37.6	39	38.6	37.2
AMBOSELI	1994	40.7	40.1	40.3	39	37.1	36.3	34.9	35.3	37.4	39.7	36.5	34.9
AMBOSELI	1995	37.8	39.3	37.6	37.3	34.5	34.4	33.1	34.2	36.8	37.6	37.7	37.2
AMBOSELI	1996	39.8	41	39.6	37.8	35.2	34.8	32.9	34.2	36.6	38.2	36.5	37.9
AMBOSELI	1997	39.2	41.3	40.5	36	32.7	33.6	31.5	33.6	34.3	34	32.5	30.7
AMBOSELI	1998	30.7	33.4	35.1	34.1	32.4	31.8	29.2	31.6	35.1	36.1	34.8	34.7
AMBOSELI	1999	36.6	37.5	35.5	33.9	34.5	33	32.6	31.8	34.6	35.3	33.1	31.7
AMBOSELI	2000	34.5	37.1	37.9	36.6	34.4	31.9	30.5	32.1	34	36	34.7	33.1
AMBOSELI	2001	32.5	34.7	35.4	34.1	33.6	32	30.7	32.6	33.6	35.2	33.1	31.9
AMBOSELI	2002	32	34.1	33.3	32.9	31.2	30.2	30.3	28.9	31.8	34	32.4	31
AMBOSELI	2003	32.3	36.1	36	34.6	29.8	30.5	29.8	30.6	32.6	33.8	32.4	33.4
AMBOSELI	2004	32.7	32.4	35	33.3	33	30.4	30.8	30.7	32.7	33.5	34	33.3
AMBOSELI	2005	35.1	35.8	35.3	33.2	33.4	31.1	29	29.8	32.8	34.4	32.7	34.2
AMBOSELI	2006	34.5	35.8	34.4	32.5	32.4	31.8	29.4	32	32	34.1	32	32.2
AMBOSELI	2007	31.7	35	36.3	34.9	33.6	32.9	31.4	31.3	33.3	33.8	33.5	33
AMBOSELI	2008	33.6	34.7	35	33.2	32.9	30.2	30	31.3	33.8	35.1	33.9	34.6
AMBOSELI	2009	34.8	35.3	36.5	35.1	33.4	32.3	31.4	30.6	34.3	34.2	34.4	34.3
AMBOSELI	2010	33.1	35.1	33.1	33.8	32.6	31	30.4	30.7	32.2	34.4	32.2	32.9
AMBOSELI	2011	34.5	35.4	34.6	34	33.2	31.4	31.6	31	32.6	33.1	33	33.2
GARISSA	1980	35.7	37.1	37.7	37.6	36.3	33.8	32.7	31.8	33.9	35.7	35.7	36.5
GARISSA	1981	36.9	37.1	36.6	34.4	33.1	33.2	32.4	33	34.1	36	36.2	35.9
GARISSA	1982	36.5	37.7	37.8	35.2	34.4	33.8	33.5	33.2	34.3	33.7	34.9	35.1
GARISSA	1983	36.7	37.6	37.7	38	35.4	34	33.7	33.5	34.2	35.7	35.1	35.6
GARISSA	1984	36.9	36.9	37.5	37.1	34.9	31.9	32	32.2	33.8	34.1	32.5	32.7
GARISSA	1985	34.4	35.8	36.2	35.3	33.4	32.4	31.7	32.1	33.1	34.4	35.1	34.5
GARISSA	1986	35.3	36.3	36.7	34.9	33	32.8	31.9	32.1	33.5	35.4	34.8	32.3
GARISSA	1987	34.6	36.3	37	36.4	33.8	32.2	32.6	31.9	34.2	35	36.1	34.6
GARISSA	1988	36.5	37	37	35.2	35.1	32.3	32.6	32.9	33.2	35.4	33.7	33.1
GARISSA	1989	33.9	35.8	36.4	33.7	33.3	32.6	32.1	32	33.9	34.5	32	32.5
GARISSA	1990	34.4	36.1	35.2	33.4	34.5	32.8	32.3	32.4	33.5	35.1	34.3	32.8
GARISSA	1991	35	36.8	36.1	35.4	34.1	32.6	30.9	31.5	33.2	35.8	35.3	34.9
GARISSA	1992	33.1	37.1	37.1	36.4	34.9	33.9	32	32.1	34.4	34.4	33.9	33
GARISSA	1993	33.2	35.8	37.2	37.3	35.8	32.8	32	32.1	33.2	34.8	35.1	33.8
GARISSA	1994	36.1	37.1	37.2	36.4	34.6	33	32	32.9	33.9	35.4	32.8	33.1
GARISSA	1995	35.7	36.6	36.8	35.8	34.4	33.4	33.1	32.3	33	35.3	35.3	34
GARISSA	1996	35.7	36.2	37.1	36.5	34.5	33	32.2	32.4	33.5	35	34.7	NA
GARISSA	1997	NA	37.2	36.8	34.7	34.2	32.6	32.4	33.3	34.5	33.7	31.3	31.5
GARISSA	1998	32	35.2	36.9	35.6	34.7	33.7	32.1	32.9	34.3	35.5	34.4	35.5
GARISSA	1999	36.4	37	37.4	35.6	34	33.1	32.2	32.7	34	35	34.4	32.5
GARISSA	2000	35.5	37.4	37.5	36.7	34.6	33	32.4	32.8	33.3	34.3	35.3	35.8
GARISSA	2001	36.1	36.3	37.8	36.2	35.3	33.3	32	32.9	34.2	35.6	34.1	34.1
GARISSA	2002	36.2	36.8	37.6	35.6	33.8	33.1	32.7	32.7	33.8	35.2	34.3	34.3
GARISSA	2003	NA	NA	NA	NA	NA	NA	NA	NA	NA	NA	NA	NA
GARISSA	2004	NA	NA	NA	NA	NA	NA	NA	NA	NA	NA	NA	NA
GARISSA	2005	36.1	NA	NA	NA	NA	NA	31.7	32.7	33.5	35.2	35	35.3
GARISSA	2006	35.4	36.6	37.4	35.6	34.7	33.3	31.9	32.9	33.6	34.2	33.1	32.4
GARISSA	2007	34.5	37.1	37.5	37.2	34.7	33.1	32.8	32.9	33.8	34.7	33.5	33.1
GARISSA	2008	34	36	39.8	34	33.7	32.1	32.2	32.6	34.7	36.2	33.8	35.4
GARISSA	2009	35.9	36.3	37.6	37.1	35.2	33.3	32.9	33.1	34.4	34.3	35.4	35.4
GARISSA	2010	36.3	37.2	36.6	34.3	34.7	33.8	32.5	32.4	32.9	35.5	35.2	35.3
GARISSA	2011	35.6	36.7	37.2	36.8	35	33.9	32.8	33.5	34.5	31.7	33.2	34.6
LAIKIPIA	1997	NA	NA	NA	24.4	24	23.7	23.1	23.8	26.4	22.9	22.1	22.4
LAIKIPIA	1998	23.5	25.8	NA	26	25	24.2	23.6	NA	25.1	25.7	23	25.2
LAIKIPIA	1999	26.1	27.5	26.1	25.4	24.6	25.4	23.6	24.9	25.9	25.6	23.6	23.7
LAIKIPIA	2000	26.2	27.6	28	26.6	25.8	24.9	24.6	24.5	26.2	25.1	23.6	24.8
LAIKIPIA	2001	26.4	28	27.6	26	25	24.4	23.8	24.9	26.4	26	22.6	24.6
LAIKIPIA	2002	26	28.2	27	24.7	24.9	25	25.4	25.2	26.8	25.8	22.8	24.2
LAIKIPIA	2003	26.4	28	28.1	26.1	24.5	24.2	24.3	24	25.3	25.3	23.4	24
LAIKIPIA	2005	27.3	28.5	28.4	26	24.2	23.9	22.7	24.6	24.9	24.5	24.7	26.5
LAIKIPIA	2006	26.8	27.9	27.1	24.4	24.5	25.3	24.3	24.6	24.5	25	23	23.5
LAIKIPIA	2007	25.4	27	27.2	25.2	24.3	23.8	22.9	23.3	24.5	24.1	24.2	25.2
LAIKIPIA	2008	26	27.1	27.2	24.9	24.7	24.6	23.7	24.5	25.9	23.9	23.5	25.2
LAIKIPIA	2009	26	26.9	28.2	26.7	25.5	26	24.6	25.3	26.5	24.4	24.3	24.2
LAIKIPIA	2010	25	25.6	25.1	24.3	24.3	23.9	22.9	23.9	24.7	24.5	23.5	26.1
LAIKIPIA	2011	26.6	27.8	27.6	26.2	24.6	24.8	24.3	23.3	23.8	24.2	23.6	22.4
MACHAKOS	1988	26.7	28.7	27.8	25	23.7	23	22.6	22.7	24.2	27.1	23.7	23.1
MACHAKOS	1989	24.6	25.8	27.2	23.8	23.7	22.6	21.3	21.3	24.7	25.5	23.6	24.3
MACHAKOS	1990	24.7	27.5	25.8	24.4	24	22.5	22.1	21.7	25.2	26.6	24.3	23.9
MACHAKOS	1991	25.9	28	28.4	26.2	24.6	24.2	22	22.4	25.4	27.3	24.6	24
MACHAKOS	1992	25	28.7	28.8	26.5	24.3	22.9	21.9	21.7	25	26.3	24.2	23.8
MACHAKOS	1993	23.5	24.4	26.4	26.3	26.2	23.3	21.8	23.1	25.6	26.9	25.3	24.5
MACHAKOS	1994	27.1	27.9	27.5	26.6	24.9	23.8	22.8	22.7	25.4	26.6	23.9	23.4
MACHAKOS	1995	25.8	27.1	25.6	25.7	24.9	24.4	22.4	23.4	25.8	26.4	24.5	24.6
MACHAKOS	1996	26.6	28.3	28.2	25.7	24.7	22.6	22.2	23.6	26.1	27.1	24.4	25.5
MACHAKOS	1997	27.5	29.5	28.7	25.3	23.9	23.3	23	24.5	26.6	25.3	23.3	23.9
MACHAKOS	1998	24.1	26	26.1	26	24.6	23.2	20.9	21.3	24.5	27	24.6	26.2
MACHAKOS	1999	27.9	28.9	27.2	25	24.8	23.7	22.4	23.1	25.7	26.6	24.4	23.5
MACHAKOS	2000	25.8	28.7	28.8	26.5	25.2	23.2	22.4	23.7	25.4	27.2	25.1	24.7
MACHAKOS	2001	24.6	26.4	26.9	24.9	25	23.6	21.9	24.5	26.7	27.1	24	24.2
MACHAKOS	2002	25.9	28.1	26.4	25.8	24.5	23.5	23.8	22.2	25.7	26.7	24.9	24
MACHAKOS	2003	25.3	28.8	28.6	26.8	23.9	23.2	22.3	22.8	25.1	26.4	24.5	25.3
MACHAKOS	2004	25.9	26.7	27.3	25.4	25.1	23.5	24.2	23.6	26.4	25.9	24.7	24.1
MACHAKOS	2005	26.7	28.4	28.4	26	25.1	23.5	22.4	23	25.7	26.6	24.5	24.4
MACHAKOS	2006	25.8	27.7	27.6	25.9	24.8	23.5	21.7	24.2	25.1	27.1	23.8	24.1
MACHAKOS	2007	24.7	27.2	27.4	26.2	24.6	24.2	22.8	23.1	25.8	26.5	24.4	24.6
MACHAKOS	2008	25.6	26.6	27.3	24.7	24.7	23	22.2	23.6	26.7	27.2	25.3	26.2
MACHAKOS	2009	26.4	27	29.1	27.1	25.1	25.4	23.6	23.6	26.6	25.7	25.9	24.9
MACHAKOS	2010	25.7	27.4	25.2	25.4	24.6	23.3	22.7	23.3	25.5	27.5	24	25.7
MACHAKOS	2011	27.9	28.2	27.7	26.3	25.8	25.4	25.1	23.3	25.7	25.6	24.5	25.2
MAKINDU	1980	28.3	29.9	31.9	30.7	29.9	26.6	25.9	26.4	29.2	30.7	29.2	28.3
MAKINDU	1981	31.1	32.1	30.9	27.7	26.1	26.8	25.2	27.1	28.8	29.7	29.6	28
MAKINDU	1982	30.3	32.7	32.6	28.3	27.6	28.2	28.3	26.8	28.2	28.2	27.7	27.1
MAKINDU	1983	28.4	30.3	32.1	31.5	30.8	28.2	27.3	29.2	29.2	30.5	30.7	28.4
MAKINDU	1984	29.9	32.1	21.9	20.9	28.3	28	25.9	26.1	28.8	28.5	26.5	26.5
MAKINDU	1985	28.7	30	30.7	29.2	28.2	26.8	25.6	26.6	28.5	29.2	27.8	27.1
MAKINDU	1986	30.2	32.7	32	29.7	27	26.5	26.1	27.2	18	30.4	28.3	26.8
MAKINDU	1987	28.5	31.1	33.1	32.8	28.5	27.3	27.3	27.7	29.6	31	30.6	30.2
MAKINDU	1988	30.4	32.1	31.9	28.5	28.5	27.4	26.9	26.9	28.3	30.7	27.8	26.4
MAKINDU	1989	27.4	29.8	31.1	27.2	28.1	26.6	25.8	25.9	28.4	29.3	26.8	26.9
MAKINDU	1990	27.8	30.1	28.3	27.8	28.1	26.9	26.2	26.1	28.6	30.4	28.8	26.8
MAKINDU	1991	28.5	31.5	31.6	29.8	28.2	27.5	26.4	26.4	28.9	31	28.7	26.5
MAKINDU	1992	26.4	32.1	33	29.8	28.2	26.7	25	25.6	28.3	29.6	27.2	27.6
MAKINDU	1993	27.2	27.1	30.1	30.9	28.6	28	24.6	26.7	27.6	29.9	27.8	28.1
MAKINDU	1994	30.2	32.1	31.9	30.4	29.1	27.7	27.1	27	28.7	30.3	27.7	26
MAKINDU	1995	27.9	30.6	29.8	30.3	29.4	28	27	28	29.3	30	28.3	28.5
MAKINDU	1996	30.7	31.8	30.8	29.6	28.9	26.8	26.1	27	28.6	29.9	28.4	28.8
MAKINDU	1997	30.8	32.7	31.8	29.1	27	27.5	27	28.1	29.5	28.9	26.8	26.4
MAKINDU	1998	26.8	29.1	29.6	29.3	27.7	27.3	25.8	26.7	28.1	30.3	29.2	29.6
MAKINDU	1999	30.8	32	31.1	29.1	29.3	27.4	26.6	26.8	29.2	30.3	28.1	26.9
MAKINDU	2000	28.3	31.6	32.1	30	29	27.3	26.4	27.7	28.5	30.6	28.9	27.8
MAKINDU	2001	27.7	30.1	31.7	29.4	29.9	27.7	26.6	28.5	29.6	30.6	27.8	27
MAKINDU	2002	27.8	30.6	30.2	29.9	29.8	28.1	28.5	26.6	29.1	30	29.1	27.8
MAKINDU	2003	30.2	32.5	32.5	30.9	28	28.1	27.4	27.4	29.6	30.5	29.2	29.8
MAKINDU	2004	29.1	29.5	31.6	29.8	30.1	27.8	27.8	27.9	29.6	30.4	30.4	28.5
MAKINDU	2005	30	32.1	32.4	30.8	30.4	26.5	26.8	26.9	27.3	30.8	29.4	30
MAKINDU	2006	30.8	32.2	31.9	29.6	28.1	28.5	26.7	28.9	27.7	28.9	27.7	27.1
MAKINDU	2007	27.8	31.6	31.6	30.9	30.1	29.3	27.8	28.1	30	30.5	28.9	28.5
MAKINDU	2008	29.3	30.9	31.5	29.4	29.4	27.6	26.4	27.9	30.3	31.6	29.4	30.3
MAKINDU	2009	30.3	31.3	32.8	31.9	30.2	29.2	27.8	27.7	30	29.5	30	29.2
MAKINDU	2010	30	31.1	29.4	29.7	29.4	28.6	27.8	27.7	29	31.2	28.9	29.2
MAKINDU	2011	31.1	31.8	31.8	31.3	30.7	28.7	28.5	28	29.8	30.4	29.1	29.4
MERU	1980	24.2	25.2	27.2	25.9	23.4	22.4	22.7	23.4	25.9	26.9	23.5	23.6
MERU	1981	24.7	26.8	25.2	23.3	22.4	21.8	20.8	23.2	25	25.9	23.7	23.3
MERU	1982	25	27.7	28.2	23.6	23.2	23.4	23.2	22.9	26.3	24.4	23.1	22.9
MERU	1983	24.9	25.9	27.7	26.6	24.1	23	22.9	22.9	24.9	25.8	24.2	23.4
MERU	1984	25.1	27	27.2	26.5	24.6	24.2	22.3	22.8	25.6	23.9	22.7	23.4
MERU	1985	24.6	26.1	26.3	23.7	22.3	21.2	21.7	22.4	25.1	25.2	23.1	23
MERU	1986	25	27.4	26.8	24.1	22.9	20.7	21.1	23	24.8	25.9	23.6	23.5
MERU	1987	24.1	26.1	27.3	25.3	24.4	22.4	23.1	23.8	26.5	27.4	28.8	24.7
MERU	1988	25.7	27.2	27.8	24.5	23.2	22.8	21.8	22.1	23.9	25.8	22.7	22.8
MERU	1989	23.8	25.2	26.2	23.2	23.8	22.6	21.2	22	24.7	24.5	23.1	23.5
MERU	1990	24.6	24.8	24.8	23.9	23.5	22.1	21.1	21.4	24.9	25.1	23.3	22.7
MERU	1991	24.2	25.9	26.4	24.6	23.6	22.5	20.9	21.3	23.9	25.4	23.3	23.3
MERU	1992	24.1	26.4	27	25.7	23.5	22.8	21.6	20.9	25	25.6	23.3	22.9
MERU	1993	22.1	23.9	25.6	24.7	23.6	22.1	21.1	22.7	27.4	25.8	23.8	23.4
MERU	1994	24.8	26.8	26.3	25	23.5	22.6	22.3	21.7	25.2	25.2	22.9	22.9
MERU	1995	24.6	26.1	24.6	23.8	23.2	22.3	22.1	22.5	24.5	24.3	22.5	23.5
MERU	1996	22.8	25.5	25.1	23.7	23.6	20.2	20	22	24.6	25.4	22.9	23.7
MERU	1997	24	27.1	26.6	23.8	23.4	22.8	22.1	23.4	24.5	23.1	22.4	22.5
MERU	1998	23.1	25.3	25.3	24.9	23.3	21.9	19.9	20.7	23.1	25.5	22.4	22.3
MERU	1999	24.3	26.2	25.5	24.3	23.3	22.7	21.5	23.1	25	25.4	23.4	22.5
MERU	2000	24.2	26.3	26	25.4	24.7	23.2	21.2	22.7	24.8	26.2	23.4	23.4
MERU	2001	23.4	25.7	26.3	23.8	23.7	21.9	20.9	22.7	25.1	25.8	22.4	23
MERU	2002	23.9	26	25.1	23.5	22.6	21	21.9	21.7	24.2	24.2	23.8	23.7
MERU	2003	24.8	27.4	26.8	24.8	23.4	22.4	21.6	21.4	24.4	24.9	23.1	23.4
MERU	2004	24.5	24.8	26.4	23.8	23.1	22	22.1	22.3	24.9	24.8	22.8	23.7
MERU	2005	24.8	26.1	27	25.4	23.3	21.3	20.5	21.5	23.7	25.4	23.8	24.2
MERU	2006	24.8	26.4	26.1	24.1	23.4	22.7	22.6	22.5	24.1	24.3	23	23.3
MERU	2007	23.6	26.7	26.2	24	23.5	22.4	21.6	22.1	24.6	24.6	23.7	23.9
MERU	2008	24.5	25.2	25.8	23.8	23.1	21.6	21	22.8	25.6	15.4	26	25.8
MERU	2009	24.9	25.1	27.1	25.1	23.4	23.5	22.5	22.3	25.5	24.4	24.2	23.6
MERU	2010	24.3	25.2	24.6	22.9	22.4	21.2	20.9	24.2	26.6	23.1	24	24
MERU	2011	25	26.8	26.6	25.7	23.9	22.7	22.6	22.2	24.2	24.4	23.2	24.1
NAKURU	1984	27.6	29.6	30	28.1	27.3	26.1	25.3	25.7	26.9	24.8	24.3	26.2
NAKURU	1985	28.7	27.9	28.4	24.6	24	24.6	23.4	23.6	26.1	26.5	25.7	26.9
NAKURU	1986	28.7	30	28.6	26.5	24.6	23.6	23.5	24.8	25.3	26.2	25.7	25.5
NAKURU	1987	27.8	29.4	29.4	27.1	25	23.7	24.9	25.5	28.4	27.9	25.1	28.1
NAKURU	1988	27.6	28.4	28.8	24.9	24.4	23.8	22.8	23.3	24.1	24.8	23.9	24.9
NAKURU	1989	26.1	26.7	27.3	24.5	24.1	24.3	23.4	24	24.2	23.9	23.7	24.8
NAKURU	1990	25.7	27.2	24.9	24.4	24.6	24.6	24.6	24.4	26.6	25.8	24.6	25.2
NAKURU	1991	27.7	29.3	28.3	25.3	25.5	25	22.9	24.9	26	25.5	24.6	26.4
NAKURU	1992	28.3	28.8	29.5	27	24.6	24.7	22.7	23.3	24.5	24.3	24.1	24.2
NAKURU	1993	23.7	25.7	28.4	26.9	25.8	23.9	23.8	25.3	26.8	27.3	25.7	26.7
NAKURU	1994	28.9	29.2	28.9	26.5	24.6	23.9	22.9	23.7	26	25.5	22	25.5
NAKURU	1995	28.6	28.6	26.7	26.6	25.4	26.1	23.3	25.4	25.3	24.3	24.7	24.8
NAKURU	1996	27.8	28.8	27.9	26.7	25.5	22.8	23	24.3	25	25.5	23.6	26.7
NAKURU	1997	28.3	29.8	29.2	24.6	24.7	24.5	23.1	24.5	27.6	24.7	22.9	23.8
NAKURU	1998	24	26.9	28.1	26.9	25.3	23.4	23.4	24.7	25.7	25.8	24.3	27
NAKURU	1999	28	29.3	27.1	26	25.2	26	24.3	24.4	26.2	26.4	24.4	25.1
NAKURU	2000	28.4	29.4	29.6	27.7	27.2	25.8	24.4	24.1	26.1	26.4	24.4	26.2
NAKURU	2001	26.1	28.9	27.3	24.1	25	23.9	23.8	24.6	25.7	25.9	23.4	26
NAKURU	2002	26.3	28.9	27.1	25.4	25	24.7	25.4	24.7	26.8	25.9	24.9	24.4
NAKURU	2003	26.3	29.2	29.2	26.2	24.1	23.8	23.9	23.3	25.3	25.3	24.4	25.7
NAKURU	2004	26.7	27.6	28.4	25.2	25.5	23.8	25	25.2	26.3	24.9	24	26.5
NAKURU	2005	28.2	29.9	28.8	26.9	24.4	24.4	23.3	24.6	24.8	25.5	25.3	27.3
NAKURU	2006	27.8	29.3	27.8	25.2	24.8	24.9	24.1	24.8	26.3	26.6	23.3	23.9
NAKURU	2007	25.8	26.6	27.6	25.9	25	23.4	23.1	23.6	24.7	24.7	24.6	26.1
NAKURU	2008	27.1	28.4	27.8	25.5	25.7	25.4	24.3	24.7	25.8	24.5	24.7	26.5
NAKURU	2009	27.5	29	30.1	27	25.7	26.3	26.1	27	28	25.8	25.8	25.7
NAKURU	2010	26.4	27.3	25.8	25.5	24.8	24.4	24	24.2	24.9	25	24.8	26.9
NAKURU	2011	28.2	29.4	28.4	26.6	25.4	24.8	24.7	23.8	24.6	24.5	24.2	24.8
NAROK	1984	26.2	28.3	28.2	25.5	24.6	23.2	21.7	23.1	25.7	24.2	24.8	25.3
NAROK	1985	27.5	28.9	26.2	22.9	21.6	21.4	21.5	21.8	24.8	25.5	24.8	25.6
NAROK	1986	26.2	28.2	27.7	25.2	22	21.3	22.4	23.9	24.6	26.7	24.8	24.9
NAROK	1987	25.8	26.9	27.4	25.4	24.5	22.2	22.2	22.9	26	26.9	24.9	26.8
NAROK	1988	26.1	27.5	26.2	23.7	23	21.9	21.9	22.2	24.3	25.5	25.4	25.5
NAROK	1989	24.1	24.9	26.1	22.8	21.8	21.1	21.3	21.8	23.9	24.6	25.3	25.4
NAROK	1990	24.6	26.2	23.6	23.3	22.4	21.7	22.3	22.3	25	25.7	25	26.1
NAROK	1991	27.9	29	27.7	24.9	22.9	22.5	21.2	24.1	25.8	25.2	25.4	25.5
NAROK	1992	27.7	27.3	28.4	23.8	22.8	22.1	21.8	22.2	24.2	25.5	25.3	25.8
NAROK	1993	24	24.8	26.1	26.5	24	22	22	22.8	25.3	26.2	26.2	26.8
NAROK	1994	27.4	26.7	25.5	25	22.1	22.8	21.9	22.9	25.2	26.1	24.5	25.9
NAROK	1995	28	27.2	25.6	25.5	23.3	23.9	22.5	23.5	25.2	25.6	25.9	26
NAROK	1996	27	26	26.8	24.1	23.3	21.8	20.9	23.4	25	26.4	25	26.7
NAROK	1997	27.7	29.9	28.5	23.7	22.2	22.2	22.1	23.9	26.4	25.4	23.4	23.4
NAROK	1998	24.1	25.5	26.8	25.3	23.3	21.4	19.8	22	24.5	26.4	25.7	28.1
NAROK	1999	27.3	29.1	26.4	23.7	23	23.1	22.6	23	25.2	25.9	25	24.3
NAROK	2000	27.9	29.4	28	25.6	24.9	23.2	22.8	23.9	25.2	26.3	25.4	24.7
NAROK	2001	23.3	25.7	26	23.7	23.2	22.9	22.3	24.1	26.3	26	25.6	27.3
NAROK	2002	26.1	26.8	25.9	25.5	22.8	22.2	23.5	23.2	25.9	26	25	25.1
NAROK	2003	26.1	27.5	28.3	25.6	22.5	21.9	22.3	23.3	24.5	26	26.2	27.5
NAROK	2004	27.4	26.7	26.1	23.5	22.8	21.8	23.2	23.6	25.2	25.6	25.9	26.7
NAROK	2006	27.7	28.2	25.5	23.1	22.9	22.8	21.7	23.6	22.9	23.4	23.8	23.1
NAROK	2007	24.9	25.4	26.2	25	23.4	21.8	21.5	22.4	24.3	25.5	26.1	26.2
NAROK	2008	27.2	26	25.5	23.4	23.2	22.5	22.2	23.4	25.6	25.3	25.6	27.5
NAROK	2009	27.7	27.4	29.1	25.6	23.9	23.8	22.8	23.7	24.4	25.6	26.3	26.3
NAROK	2010	25.6	26	25.2	24	23.9	22.9	22.5	24	24.6	25.6	25.4	25.8
NAROK	2011	27.1	27.6	26.6	26.1	24.1	24.3	24.9	22.6	24.3	24.7	23.9	25.3
VOI	1981	33.2	33.6	32.7	30.9	29.4	29.3	27.6	28.9	29.7	31.7	32.7	30.6
VOI	1982	31.1	34.1	34.7	31.1	29.6	30	28.8	28.5	27.8	29.4	31.2	30
VOI	1983	32.1	33.2	34.3	33.8	31	30.3	29.3	29.5	30.5	32.3	32.9	31.3
VOI	1984	33.2	33.5	34.3	32.7	30.6	29.3	27.6	27.5	29.2	30.7	30.9	29.9
VOI	1985	30.6	32	33.4	32.4	30.4	29	28.1	28.1	29.5	31.1	31.9	29.9
VOI	1986	32.2	24.6	34.9	32.5	29.5	29	28.8	31	30.4	32.7	32.1	30.1
VOI	1987	30.6	33.3	34.5	32.9	29.9	29.7	28.8	28.4	30.8	32.9	33.2	34
VOI	1988	33	34.5	34.8	31.3	30.9	29.1	28.9	28.4	28.3	32.2	31.3	30
VOI	1989	29.4	32.4	34.1	30.7	29.8	29.4	28.9	27.4	30.1	31.2	30.7	29.6
VOI	1990	32	33.9	31.4	30.3	30.5	29.4	28.9	27.8	29.8	31.4	32.2	30.5
VOI	1991	32.8	34.1	34	32.2	30	28.5	28.1	27.5	29.6	31.2	32.9	30.1
VOI	1992	32	34.1	34.2	32.3	29.8	29.5	28.3	27.8	29.6	31.5	31.2	30.5
VOI	1993	29.1	30.1	33.3	32.7	31.5	29.5	28.1	28	29.7	31.3	33.4	30.8
VOI	1994	32	34.2	34.5	31.7	29.7	29.4	28.7	28.5	29.7	32.1	30.9	29
VOI	1995	30.1	33.6	33.6	32.4	30.8	30.4	29.1	29.1	30.4	32.5	31.6	30.5
VOI	1996	32.5	34.2	33.8	31.3	29.8	29.2	28.4	28.4	29.4	31.4	31.5	31.3
VOI	1997	32.7	34.1	34.1	31.5	28.7	29.2	29	29.4	31.2	29.5	29.5	29.2
VOI	1998	29.4	31.1	32.5	31.3	29.9	29.7	28.3	28.9	29.6	31.6	32.1	31
VOI	1999	32.2	33.6	33.6	30.3	30.2	28.9	28.4	27.8	30.1	31.5	32	30.7
VOI	2000	31.6	34.4	34.4	32.3	30.2	28.6	28	28.1	29	31	32	30.6
VOI	2001	30.5	32.8	34.4	31.9	31	29.5	28	29.2	30.7	31.9	NA	30.4
VOI	2002	30.3	33.1	33.3	32.4	31.1	30.1	29.1	27.4	29.2	30.5	30.8	30.8
VOI	2003	32.2	34.6	34.9	33.2	30.7	29.4	28.8	28.1	30.2	32.2	33.3	33.2
VOI	2004	32.3	32.5	34	31.1	31.2	28.8	28.6	28.5	30.7	30.8	31.3	30.3
VOI	2005	31.8	33.6	34.2	32.5	31.8	29.9	28.3	28.2	30	31.8	32	32.7
VOI	2006	33.4	34.6	33.3	31.2	31	29.5	28.4	29.9	29.2	29.7	29.8	30
VOI	2007	30	33.9	34.1	33.9	30.9	29.8	29.1	29.1	30.6	32	32.2	32.2
VOI	2008	31.8	33	33.7	30.7	29.7	28.7	28.3	28.5	31.3	33.5	32.5	31.8
VOI	2009	32.5	33.8	34.9	32.8	31.6	29.8	28.8	28.1	30.8	30.5	32.4	31.7
VOI	2010	31.1	33.8	33.3	32.5	31.4	30.1	29.4	28.9	30.9	32.4	32.2	31.8
VOI	2011	33.6	33.5	34.3	32.4	30.4	30.1	29.6	29.1	29.9	31.3	31.4	31.7

## Sheet: Table S5
Table SV Correlation (Pearson’s R2) between altitude and climate variables at weather stationsa
	Altitude	WS1 precipitation	DS1 precipitation	WS2 precipitation	DS2 precipitation	WS1 min temp	DS1 min temp	WS2 min temp	DS2 min temp	WS1 max temp	DS1 max temp	WS2 max temp	DS2 max temp
Altitude	1	0.0490149	0.364238	0.563767	0.250746	0.946213	0.960425	0.951887	0.906645	0.809827	0.796105	0.853524	0.805601
WS1 precipitation		1	0.0848171	0.491567	0.0374501	0.000666656	0.00620663	0.00182081	1.73682e-05	0.173311	0.227512	0.155832	0.191376
DS1 precipitation			1	0.390572	0.0150447	0.316872	0.294925	0.287021	0.366226	0.218309	0.309414	0.357397	0.383215
WS2 precipitation				1	0.112499	0.397942	0.430907	0.370225	0.293949	0.66336	0.707949	0.69973	0.728163
DS2 precipitation					1	0.336392	0.311563	0.302919	0.177304	0.251349	0.158774	0.201737	0.166658
WS1 min temp						1	0.990736	0.989854	0.942238	0.662628	0.629501	0.717369	0.650624
DS1 min temp							1	0.987601	0.931763	0.683174	0.650085	0.727745	0.659406
WS2 min temp								1	0.965308	0.66723	0.633859	0.708852	0.641895
DS2 min temp									1	0.571774	0.562317	0.635622	0.577194
WS1 max temp										1	0.982327	0.973897	0.96121
DS1 max temp											1	0.984872	0.9861
WS2 max temp												1	0.991747
DS2 max temp													1
aItalicized values represent negative correlations (negative values of Pearson's R).

## Sheet: Table S6
Table SVI LULC assignments near genetically characterized baboon populations
Site	Woodland	Bushes	Grassland	Agriculture	Forest	Bare ground	Swamp
Amboseli	5.35	39.82	39.82	0	0	10.58	4.43
Emali	50.76	20.59	7.48	21.16	0	0	0
Bissil	52.25	33.73	2.39	6.12	0	5.52	0
Kiboko	40.18	34.26	2.62	20.65	2.29	0	0
Kibwezi	62.87	9.14	0.11	24.48	3.4	0	0
Magadi	42.69	5.04	45.46	0.01	0	6.8	0
Namanga	46.53	32.48	2.32	9.41	9.27	0	0
Oloitokitok	52.11	23.68	0.03	12.94	11.24	0	0
Olorgesailie	61.51	24.14	14.2	0.15	0	0	0
Sultan Hamud	66.64	6.63	3.4	23.33	0	0	0
Taita	25.61	14.28	0.4	59.71	0	0	0
